# Supplementary material for: Sterically shielded primary anilides of the alkaline-earth metals of the type (thf)nAe(NH-Ar*)2 (Ae = Mg, Ca, Sr, and Ba; Ar* = bulky aryl)
Source: Royal Society of Chemistry journal article supplement (doi:10.1039/d2dt01121b), 2022-01-01
Supplement: d2dt01121b1.pdf [file d2dt01121b1.pdf]

# Sterically shielded primary anilides of the alkaline-earth metals of the type $(\text{thf})_n\text{Ae}(\text{NH-Ar}^*)_2$ (Ae = Mg, Ca, Sr, and Ba; Ar\* = bulky aryl)

Philipp Schüler,<sup>a</sup> Sven Krieck,<sup>a</sup> Helmar Görls,<sup>a</sup> Phil Liebing,<sup>a</sup> and Matthias Westerhausen<sup>\*,a</sup>

<sup>a</sup>Institute of Inorganic and Analytical Chemistry,  
Friedrich Schiller University Jena  
Humboldtstraße 8, D-07743 Jena, Germany  
e-mail: m.we@uni-jena.de

## Content

|      |                                                                                                                                                     |    |
|------|-----------------------------------------------------------------------------------------------------------------------------------------------------|----|
| 1    | Analytical data .....                                                                                                                               | 1  |
| 1.1  | $[(\text{thf})_2\text{Mg}(\text{NH-C}_6\text{H}_2(\text{Ph})_3)_2]$ <b>1b</b> .....                                                                 | 1  |
| 1.2  | $[(\text{thf})_2\text{Ca}(\text{NH-C}_6\text{H}_2(\text{Ph})_3)_2]$ <b>1c</b> .....                                                                 | 4  |
| 1.3  | $[(\text{thf})_3\text{Sr}(\text{NH-C}_6\text{H}_2(\text{Ph})_3)_2]$ <b>1d</b> .....                                                                 | 6  |
| 1.4  | $[(\text{thf})_3\text{Ba}(\text{NH-C}_6\text{H}_2(\text{Ph})_3)_2]$ <b>1e</b> .....                                                                 | 8  |
| 1.5  | $[(\text{thf})_2\text{Mg}\{\text{NH-2,6-(Ph}_2\text{CH)-4-Me-C}_6\text{H}_2\}(\text{}^n\text{Bu}/\text{}^s\text{Bu})]$ <b>2b<sub>Bu</sub></b> ..... | 11 |
| 1.6  | $[(\text{thf})_2\text{Mg}\{\text{NH-2,6-(Ph}_2\text{CH)-4-Me-C}_6\text{H}_2\}(\text{Ph})]$ <b>2b<sub>Ph</sub></b> .....                             | 14 |
| 1.7  | $[(\text{thf})_2\text{Mg}\{\text{NH-2,6-(Ph}_2\text{CH)-4-Me-C}_6\text{H}_2\}_2]$ <b>2b</b> .....                                                   | 16 |
| 1.8  | $[(\text{thf})_2\text{Ca}\{\text{NH-2,6-(Ph}_2\text{CH)-4-Me-C}_6\text{H}_2\}_2]$ <b>2c</b> .....                                                   | 18 |
| 1.9  | $[(\text{thf})_2\text{Sr}\{\text{NH-2-(Ph}_2\text{C)-6-(Ph}_2\text{CH)-4-Me-C}_6\text{H}_2\}_2]$ <b>2d'</b> .....                                   | 20 |
| 1.10 | $[(\text{thf})_2\text{Sr}\{\text{NH-2,6-(Ph}_2\text{CH)}_2\text{-4-Me-C}_6\text{H}_2\}_2]$ <b>2d</b> .....                                          | 21 |
| 1.11 | $[(\text{thf})_2\text{Ba}\{\text{NH-2-(Ph}_2\text{C)-6-(Ph}_2\text{CH)-4-Me-C}_6\text{H}_2\}_2]$ <b>2e'</b> .....                                   | 24 |
| 2    | Crystallographic data .....                                                                                                                         | 25 |

# 1 Analytical data

## 1.1 $[(\text{thf})_2\text{Mg}(\text{NH}-\text{C}_6\text{H}_2(\text{Ph})_3)_2]$ **1b**

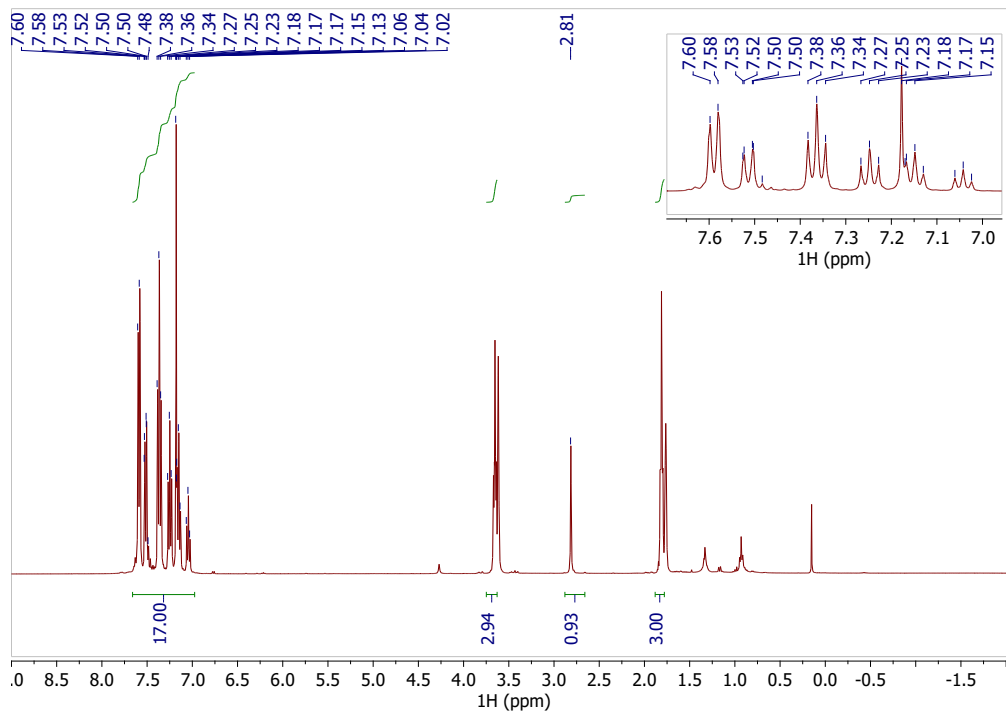

Figure S 1:  $^1\text{H}$ -NMR-Spectrum (400 MHz,  $[\text{D}_8]\text{THF}$ , 297 K) of  $[(\text{thf})_2\text{Mg}(\text{HN}-(\text{Ph})_3\text{C}_6\text{H}_2)_2]$  **1b**.

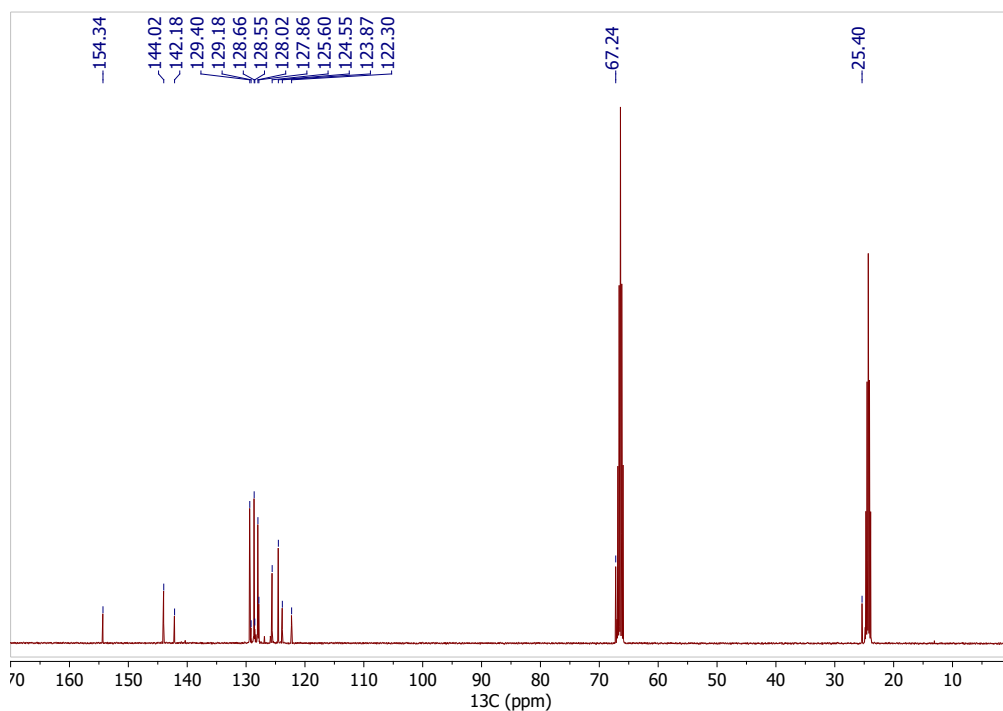

Figure S 2:  $^{13}\text{C}\{^1\text{H}\}$ -NMR -Spectrum (101 MHz,  $[\text{D}_8]\text{THF}$ , 297 K) of  $[(\text{thf})_2\text{Mg}(\text{HN}-(\text{Ph})_3\text{C}_6\text{H}_2)_2]$  **1b**.

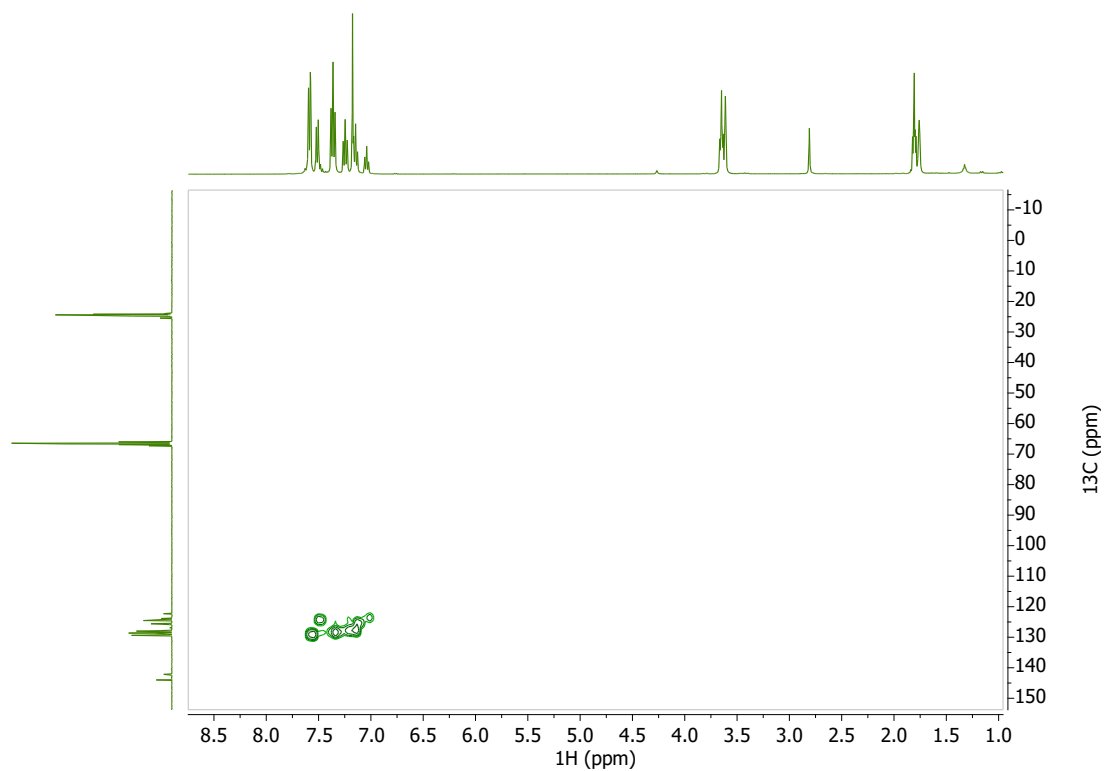

Figure S 3: HSQC-NMR-Spectrum (400 MHz,  $[\text{D}_8]$ THF, 297 K) of  $[(\text{thf})_2\text{Mg}(\text{HN}-(\text{Ph})_3\text{C}_6\text{H}_2)_2]$  **1b**.

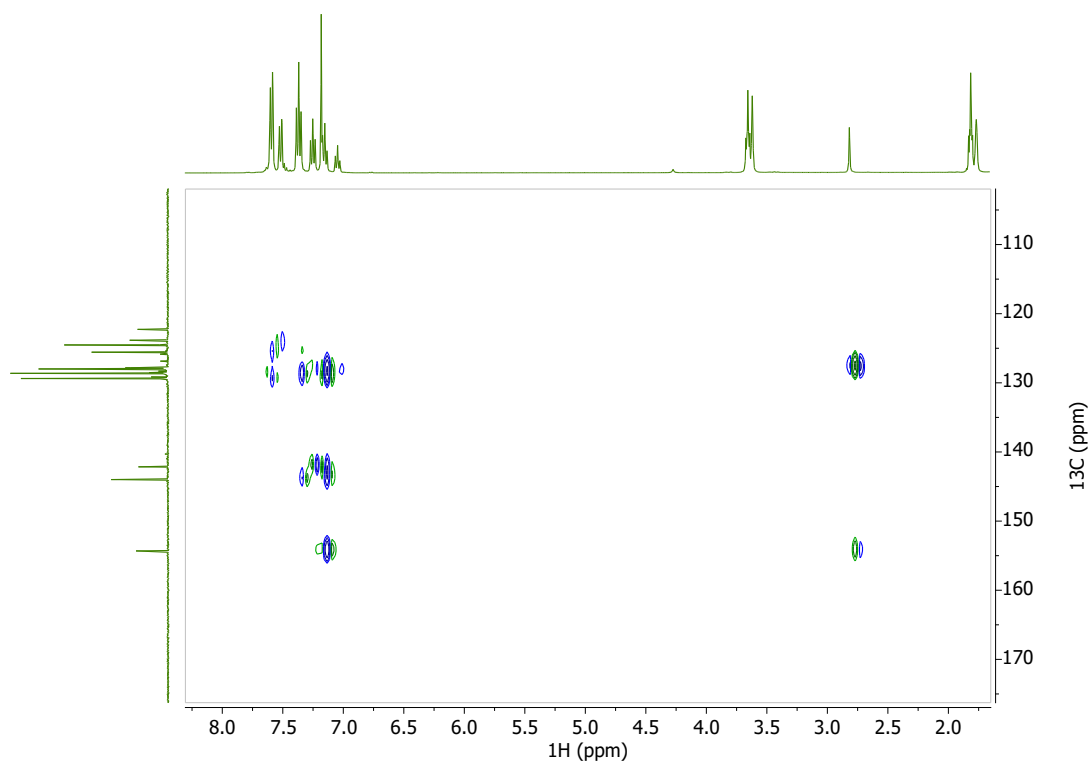

Figure S 4: HMBC-NMR-Spectrum (400 MHz,  $[\text{D}_8]$ THF, 297 K) of  $[(\text{thf})_2\text{Mg}(\text{HN}-(\text{Ph})_3\text{C}_6\text{H}_2)_2]$  **1b**.

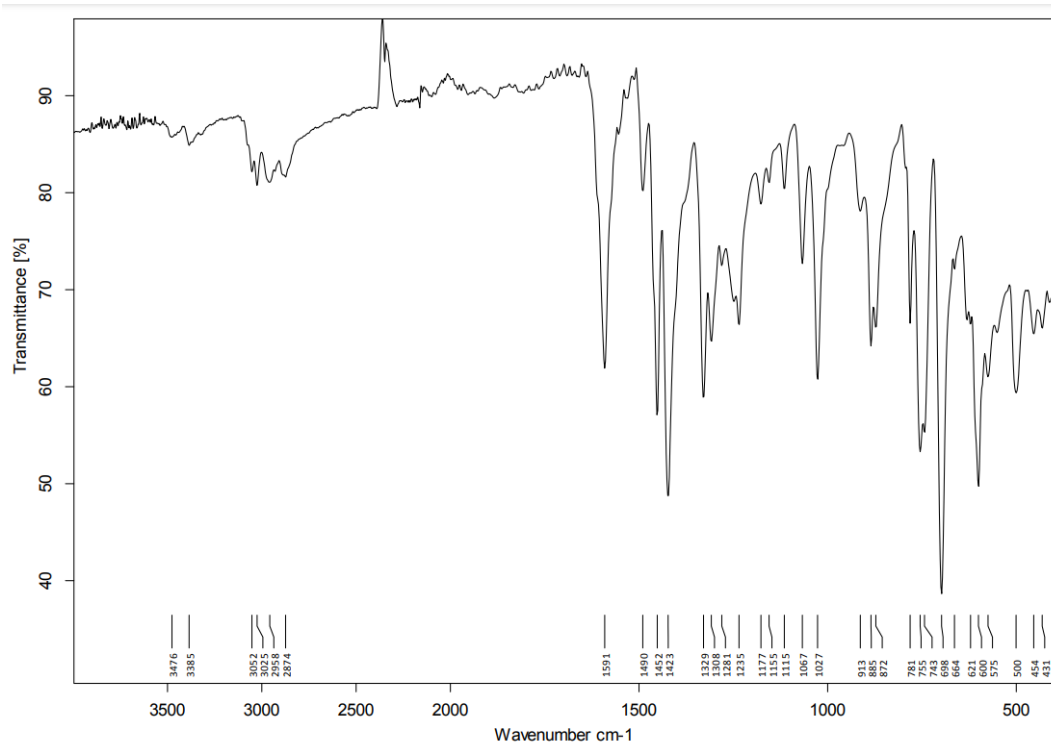

Figure S 5: IR spectrum (ATR) of  $[(\text{thf})_2\text{Mg}(\text{HN}-(\text{Ph})_3\text{C}_6\text{H}_2)_2]$  **1b**.

## 1.2 $[(\text{thf})_2\text{Ca}(\text{NH}-\text{C}_6\text{H}_2(\text{Ph})_3)_2]$ **1c**

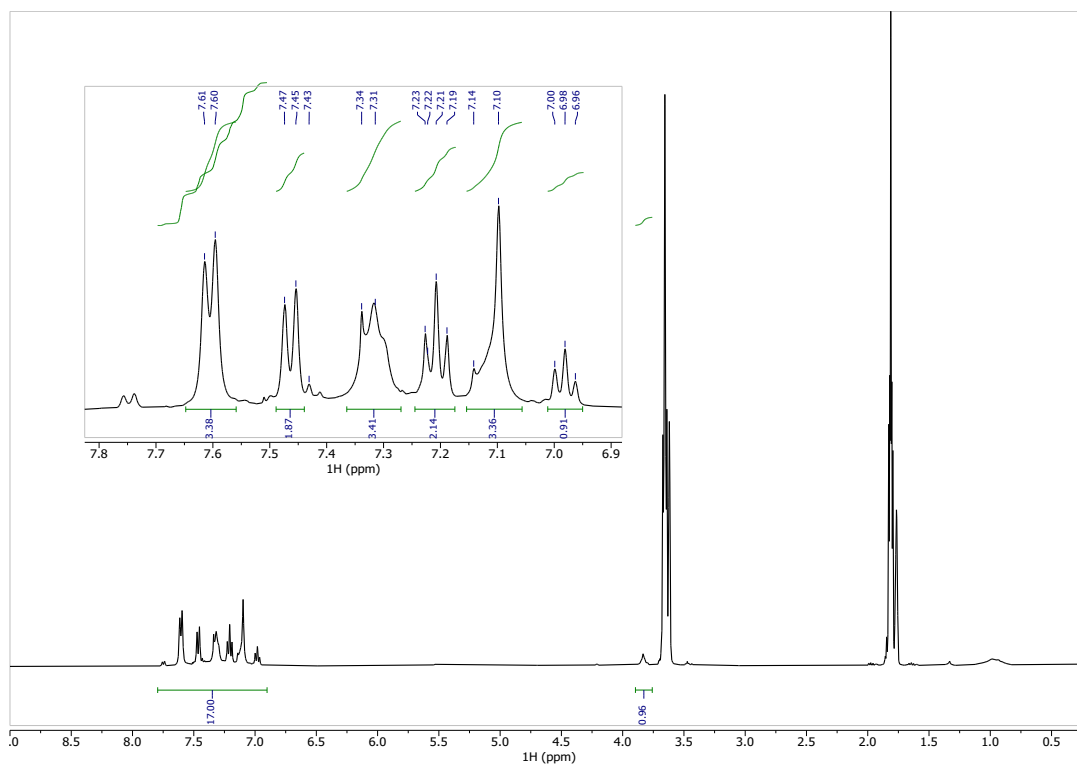

Figure S 6:  $^1\text{H}$ -NMR-Spectrum (400 MHz,  $[\text{D}_8]\text{THF}$ , 297 K) of  $[(\text{thf})_2\text{Ca}(\text{NHC}_6\text{H}_2(\text{Ph})_3)_2]$  **1c**.

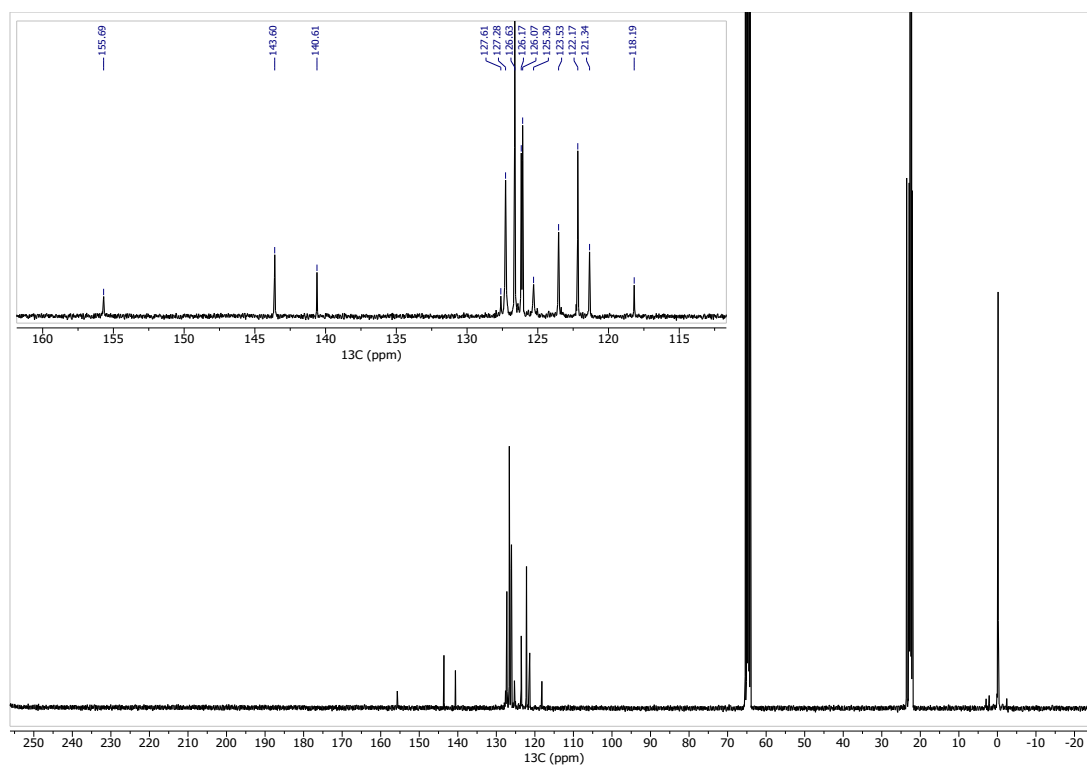

Figure S 7:  $^{13}\text{C}\{^1\text{H}\}$ -NMR-Spectrum (101 MHz,  $[\text{D}_8]\text{THF}$ , 297 K) of  $[(\text{thf})_2\text{Ca}(\text{NHC}_6\text{H}_2(\text{Ph})_3)_2]$  **1c**.

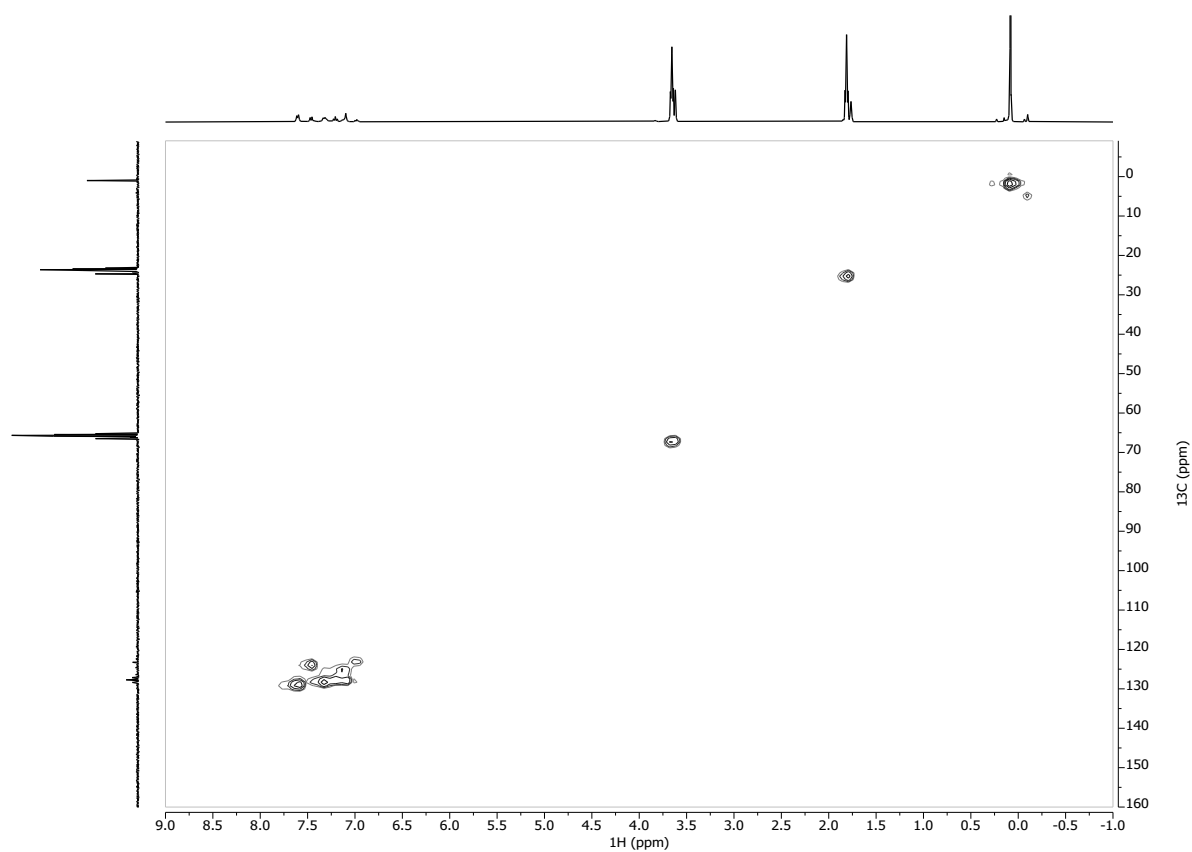

Figure S 8: HSQC-NMR-Spectrum (400 MHz, [D<sub>8</sub>]THF, 297 K) of [(thf)<sub>2</sub>Ca(NHC<sub>6</sub>H<sub>2</sub>(Ph)<sub>3</sub>)<sub>2</sub>] **1c**.

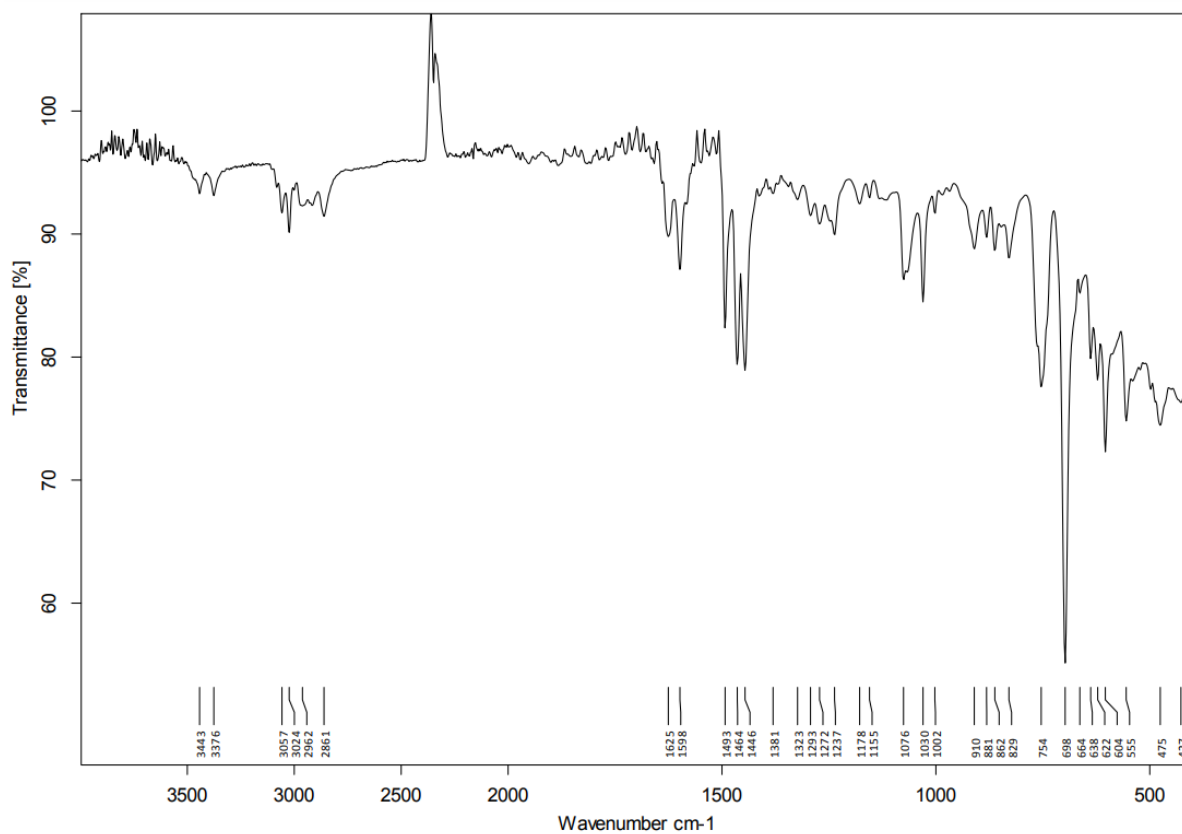

Figure S 9: IR spectrum (ATR) of [(thf)<sub>2</sub>Ca(NHC<sub>6</sub>H<sub>2</sub>(Ph)<sub>3</sub>)<sub>2</sub>] **1c**.

### 1.3 $[(\text{thf})_3\text{Sr}(\text{NH}-\text{C}_6\text{H}_2(\text{Ph})_3)_2]$ **1d**

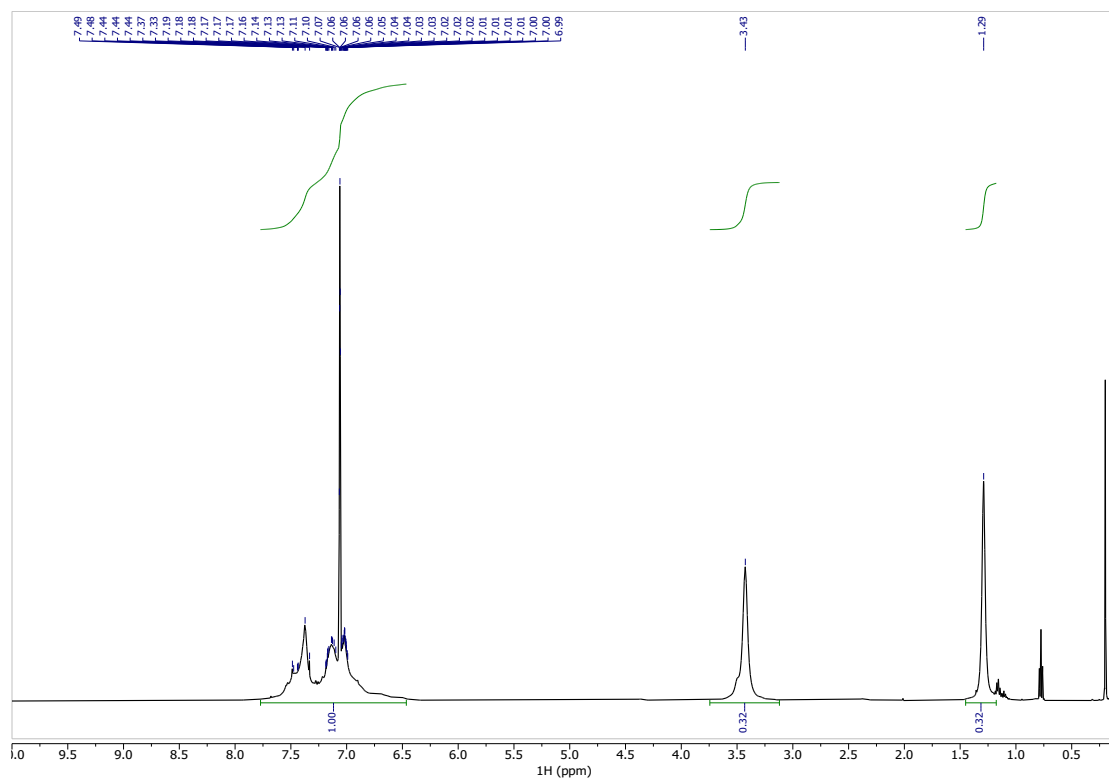

Figure S 10:  $^1\text{H}$ -NMR-Spectrum (400 MHz,  $\text{C}_6\text{D}_6$ , 297 K) of  $[(\text{thf})_3\text{Sr}\{\text{NH}-2,4,6-(\text{Ph})_3-\text{C}_6\text{H}_2\}]$  **1d**.

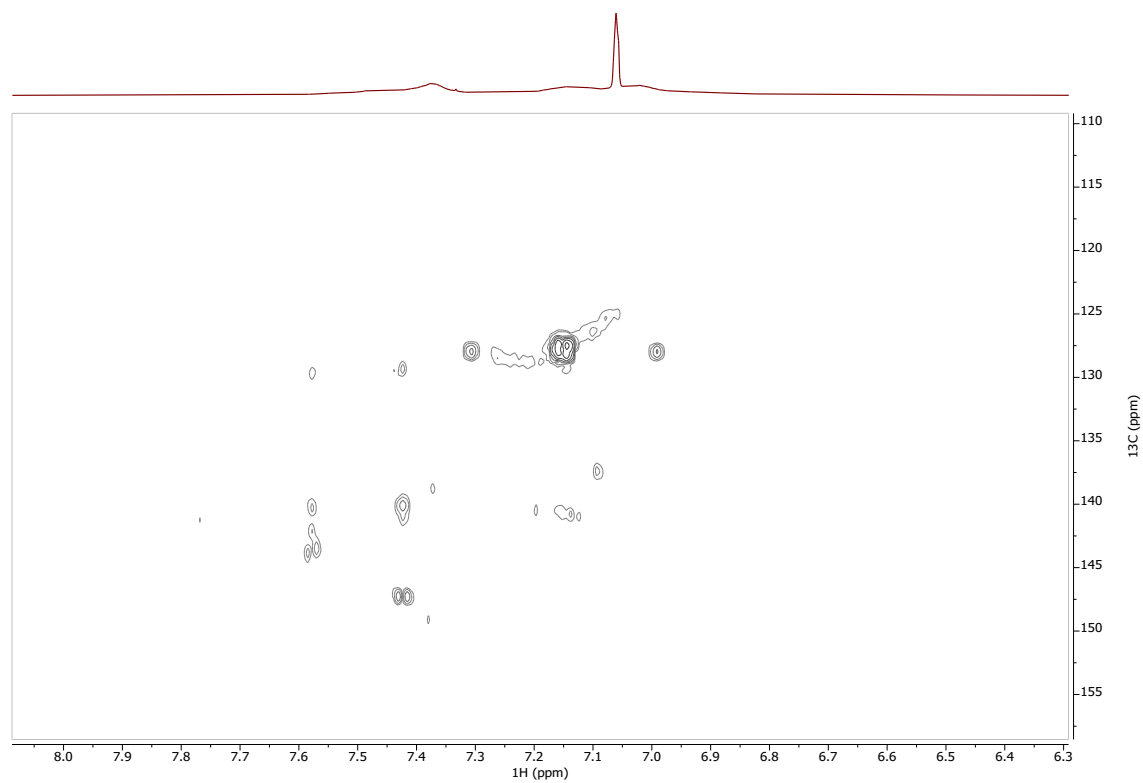

Figure S 11: HMBC -NMR-Spectrum (400 MHz,  $\text{C}_6\text{D}_6$ , 297 K) of  $[(\text{thf})_3\text{Sr}\{\text{NH}-2,4,6-(\text{Ph})_3-\text{C}_6\text{H}_2\}]$  **1d**.

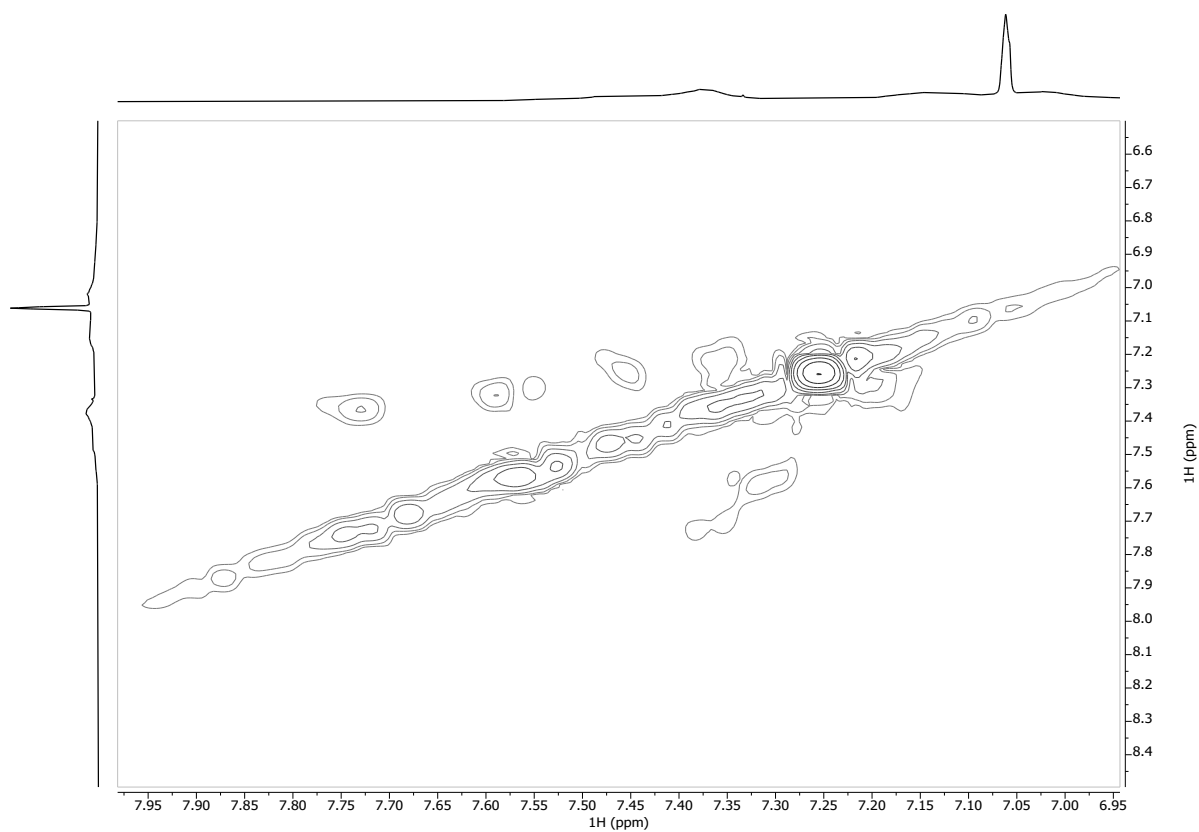

Figure S 12: H,H-COSY-NMR-Spektrum (400 MHz, C<sub>6</sub>D<sub>6</sub>, 297 K) von [(thf)<sub>3</sub>Sr{NH-2,4,6-(Ph)<sub>3</sub>-C<sub>6</sub>H<sub>2</sub>}] **1d**.

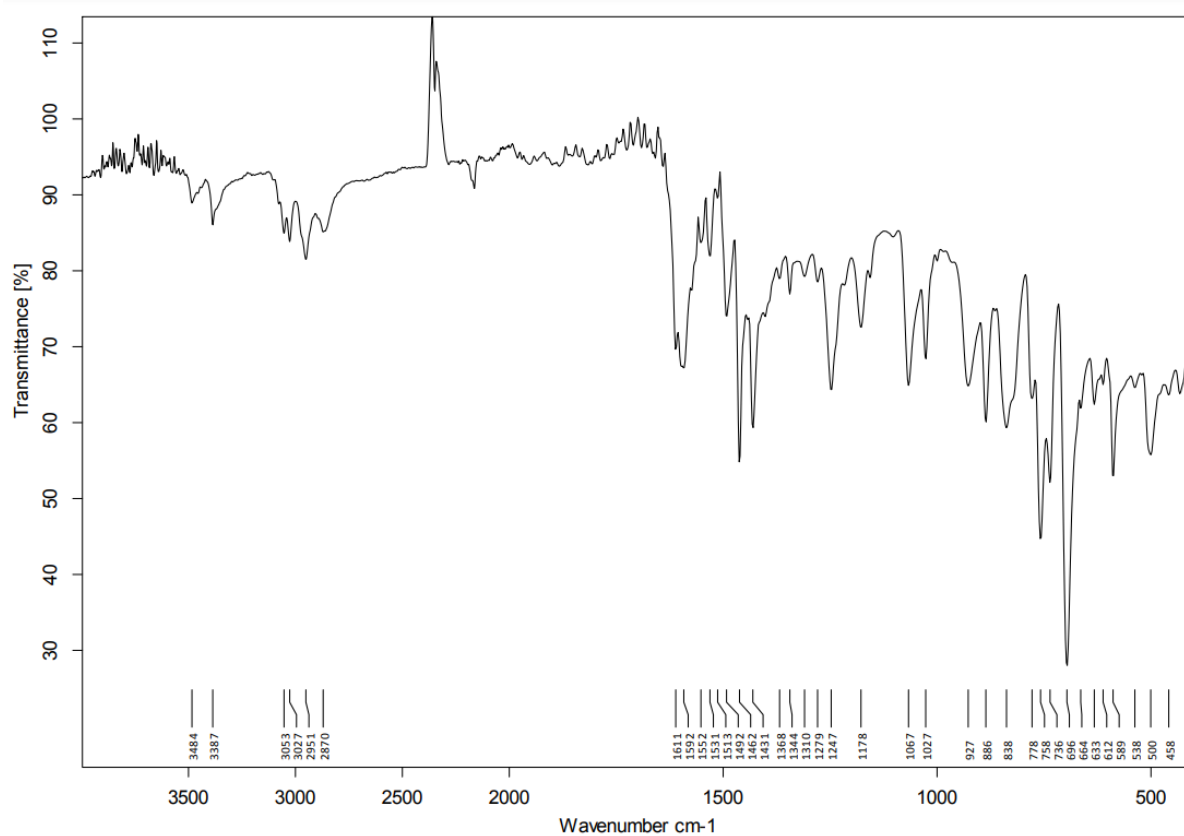

Figure S 13: IR spectrum (ATR) of [(thf)<sub>3</sub>Sr{NH-2,4,6-(Ph)<sub>3</sub>-C<sub>6</sub>H<sub>2</sub>}] **1d**.



## 1.4 [(thf)<sub>3</sub>Ba(NH-C<sub>6</sub>H<sub>2</sub>(Ph)<sub>3</sub>)<sub>2</sub>] **1e**

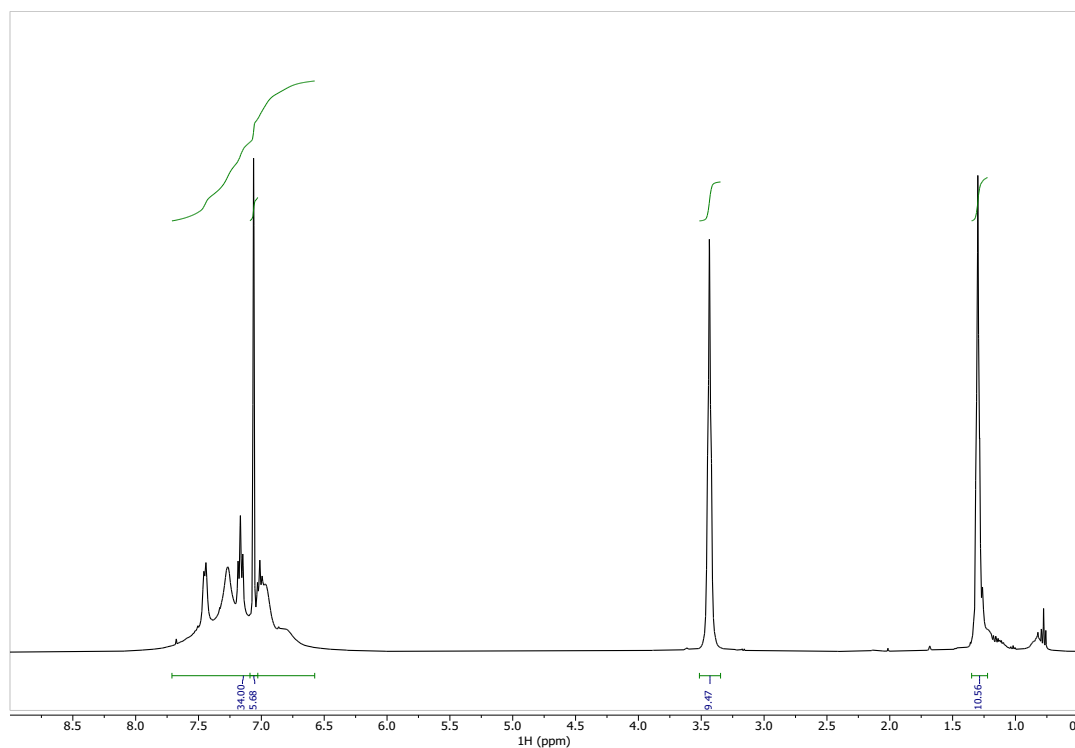

Figure S 14: <sup>1</sup>H-NMR-Spectrum (400 MHz, C<sub>6</sub>D<sub>6</sub>, 297 K) of [(thf)<sub>3</sub>Ba(NH-C<sub>6</sub>H<sub>2</sub>(Ph)<sub>3</sub>)<sub>2</sub>] **1e**.

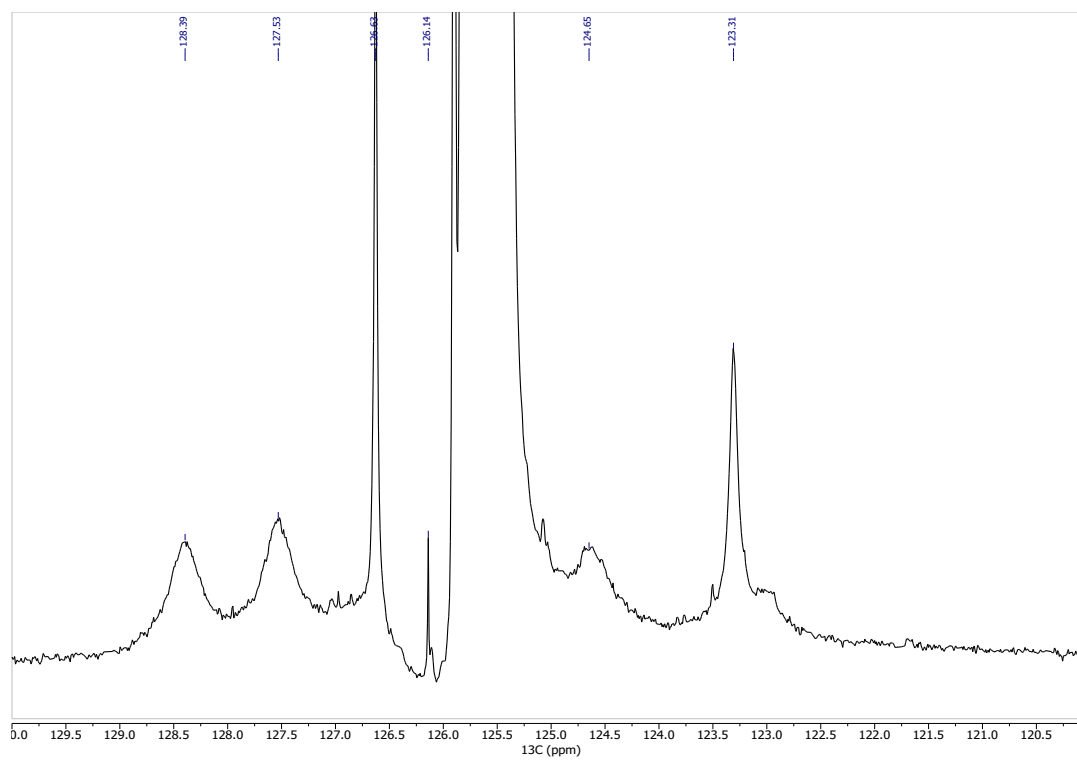

Figure S 15: <sup>13</sup>C{<sup>1</sup>H}-NMR-Spectrum (101 MHz, C<sub>6</sub>D<sub>6</sub>, 297 K) of [(thf)<sub>3</sub>Ba(NH-C<sub>6</sub>H<sub>2</sub>(Ph)<sub>3</sub>)<sub>2</sub>] **1e**.

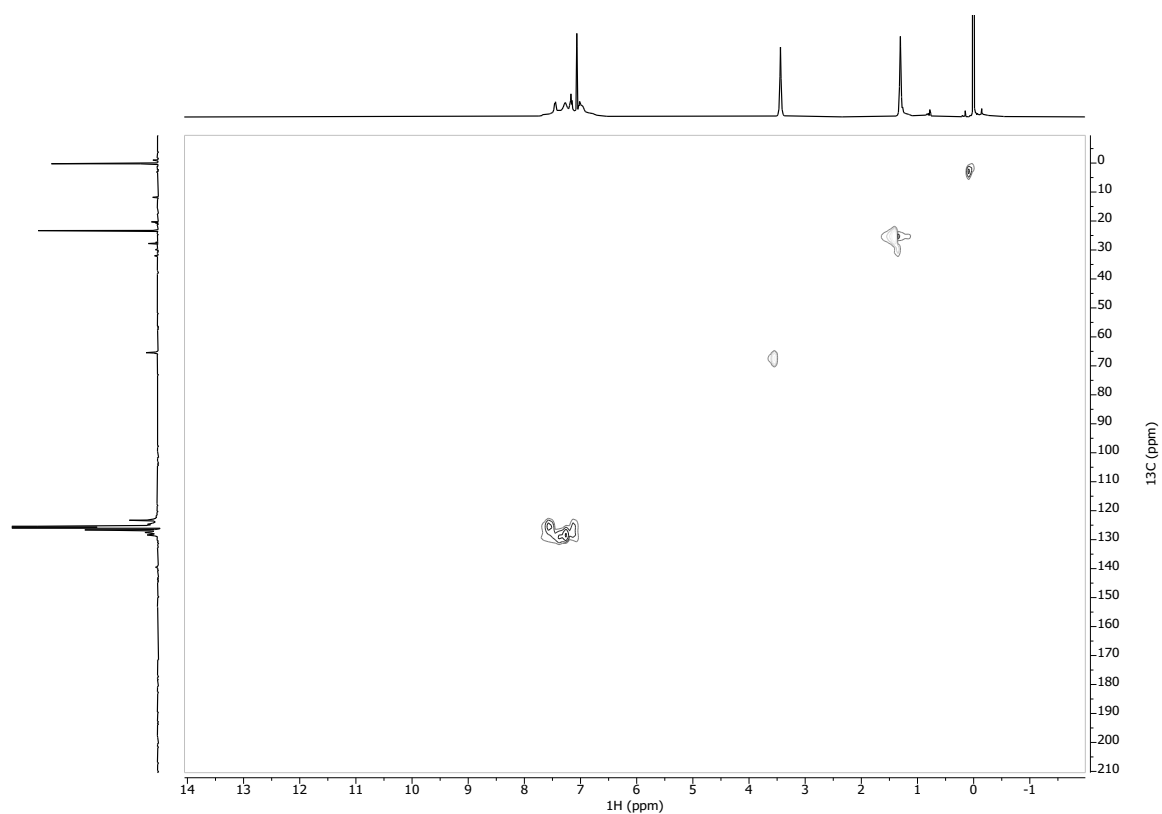

Figure S 16: HSQC-NMR-Spectrum (400 MHz, C<sub>6</sub>D<sub>6</sub>, 297 K) of [(thf)<sub>3</sub>Ba(NH-C<sub>6</sub>H<sub>2</sub>(Ph)<sub>3</sub>)<sub>2</sub>] **1e**.

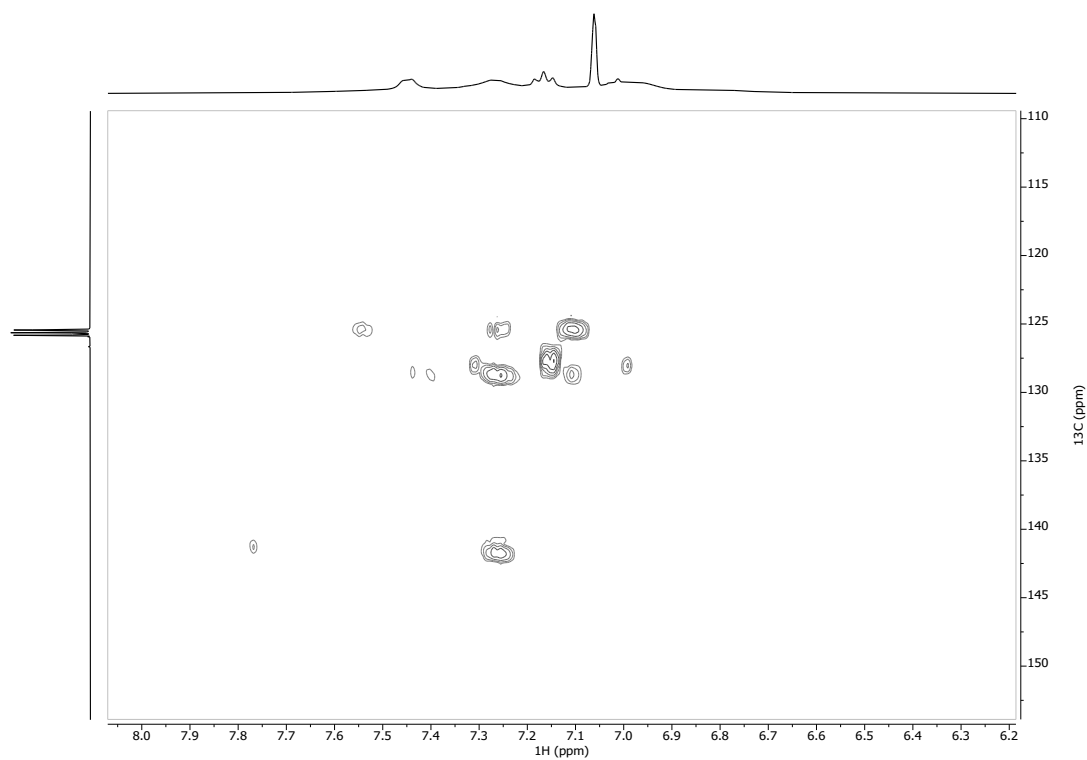

Figure S 17: HMBC-NMR-Spectrum (400 MHz, C<sub>6</sub>D<sub>6</sub>, 297 K) of [(thf)<sub>3</sub>Ba(NH-C<sub>6</sub>H<sub>2</sub>(Ph)<sub>3</sub>)<sub>2</sub>] **1e**.

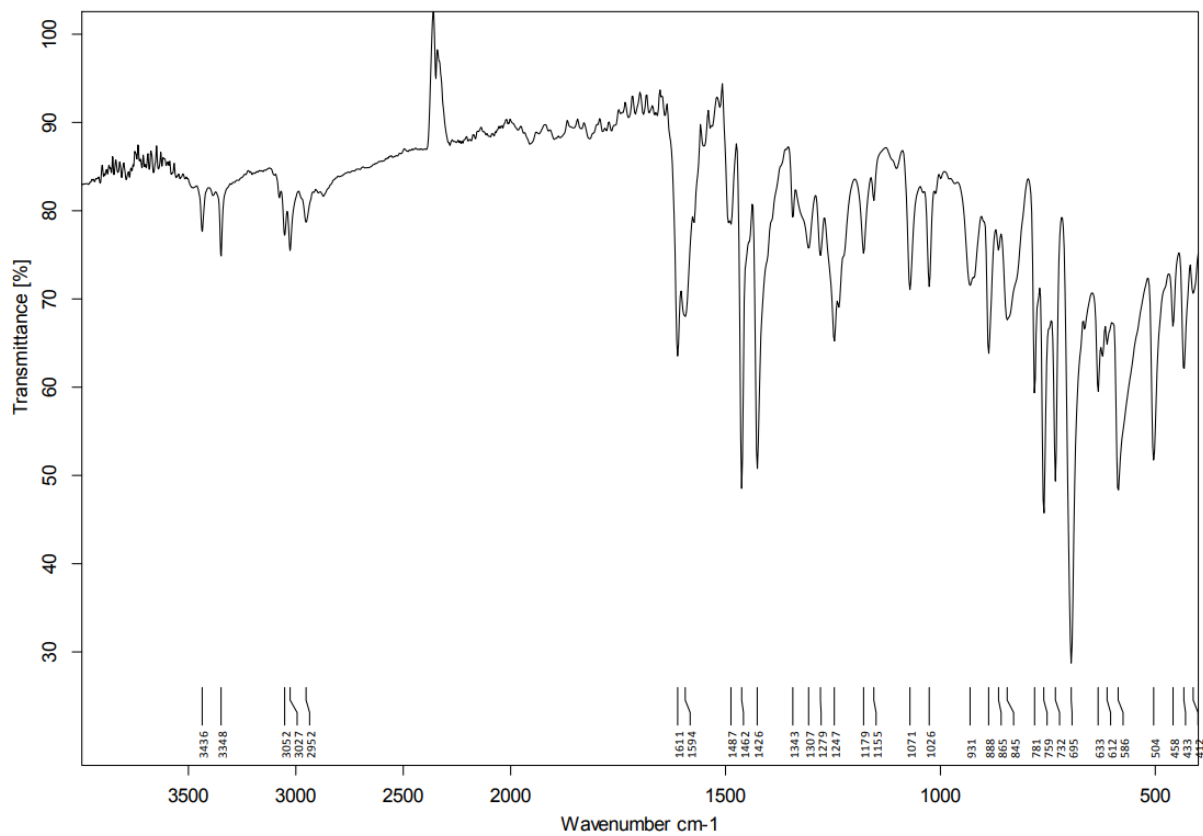

Figure S 18: IR spectrum (ATR) of  $[(\text{thf})_3\text{Ba}(\text{NH}-\text{C}_6\text{H}_2(\text{Ph})_3)_2]$  **1e**.

1.5  $[(\text{thf})_2\text{Mg}\{\text{NH}-2,6-(\text{Ph}_2\text{CH})-4-\text{Me}-\text{C}_6\text{H}_2\}({}^n\text{Bu}/{}^s\text{Bu})]$  **2b<sub>Bu</sub>**

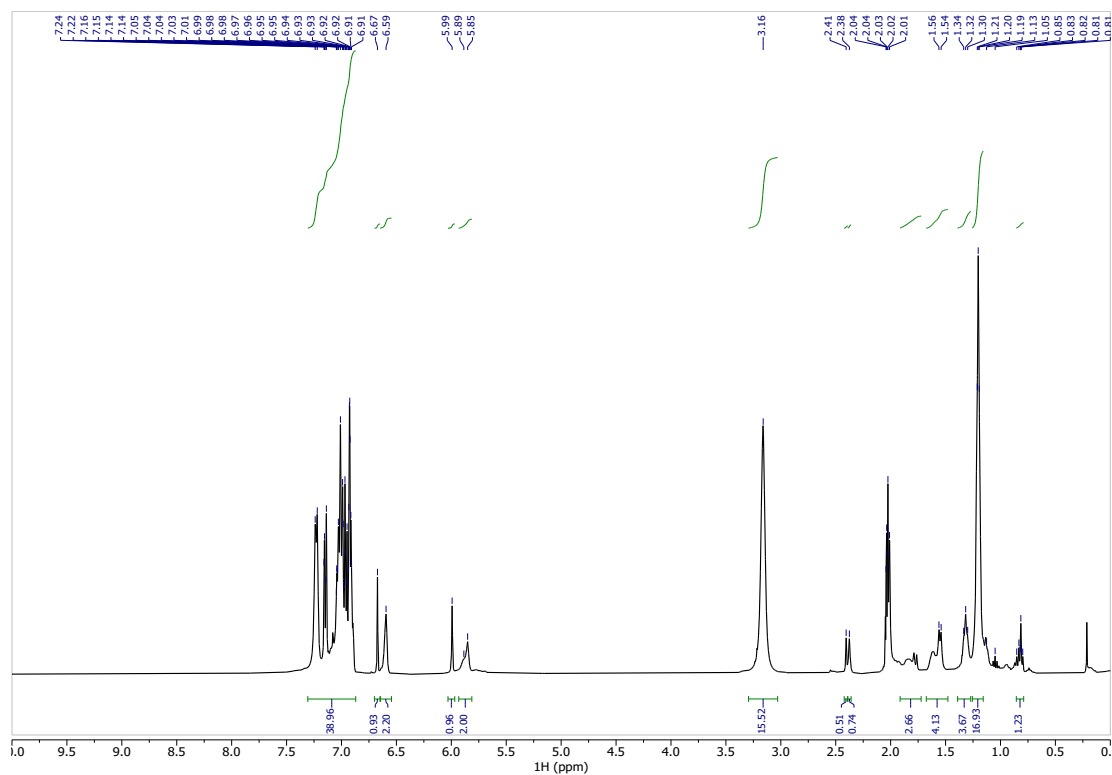

Figure S 19:  $^1\text{H-NMR}$ -Spectrum (400 MHz,  $[\text{D}_8]\text{ToI}$ , 297 K) of  $[(\text{thf})_2\text{Mg}\{\text{NH}-2,6-(\text{Ph}_2\text{CH})-4-\text{Me}-\text{C}_6\text{H}_2\}({}^n\text{Bu}/{}^s\text{Bu})]$  **2b<sub>Bu</sub>**.

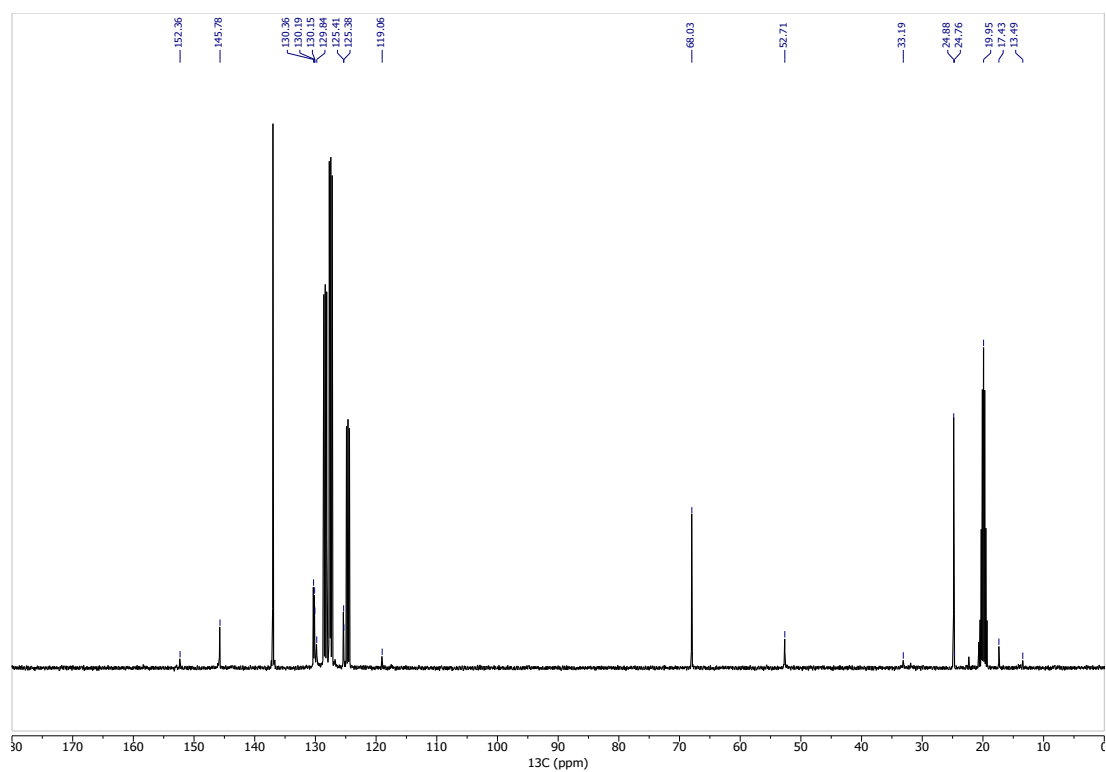

Figure S 20:  $^{13}\text{C}\{^1\text{H}\}$ -NMR-Spectrum (101 MHz,  $[\text{D}_8]\text{Tol}$ , 297 K) of  $[(\text{thf})_2\text{Mg}\{\text{NH-2,6-(Ph}_2\text{CH)-4-Me-C}_6\text{H}_2\}(\text{}^n\text{Bu}/\text{}^s\text{Bu})]$  **2b<sub>Bu</sub>**.

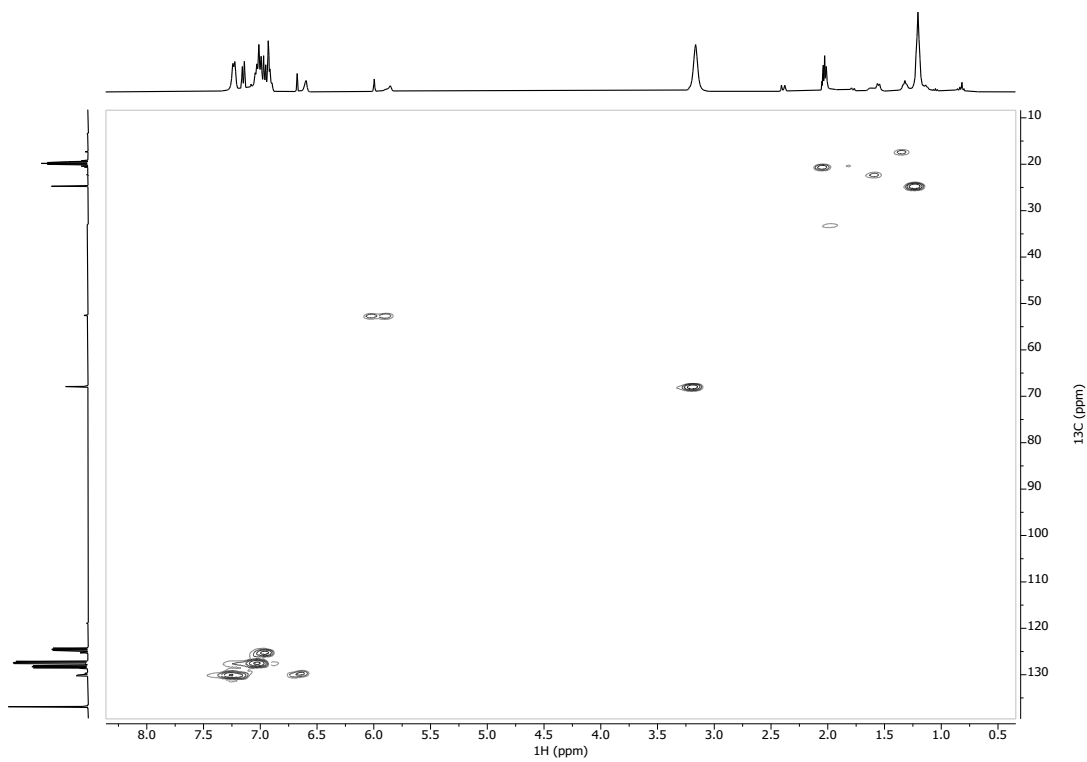

Figure S 21: HSQC-NMR-Spectrum (400 MHz,  $[\text{D}_8]\text{Tol}$ , 297 K) of  $[(\text{thf})_2\text{Mg}\{\text{NH-2,6-(Ph}_2\text{CH)-4-Me-C}_6\text{H}_2\}(\text{}^n\text{Bu}/\text{}^s\text{Bu})]$  **2b<sub>Bu</sub>**.

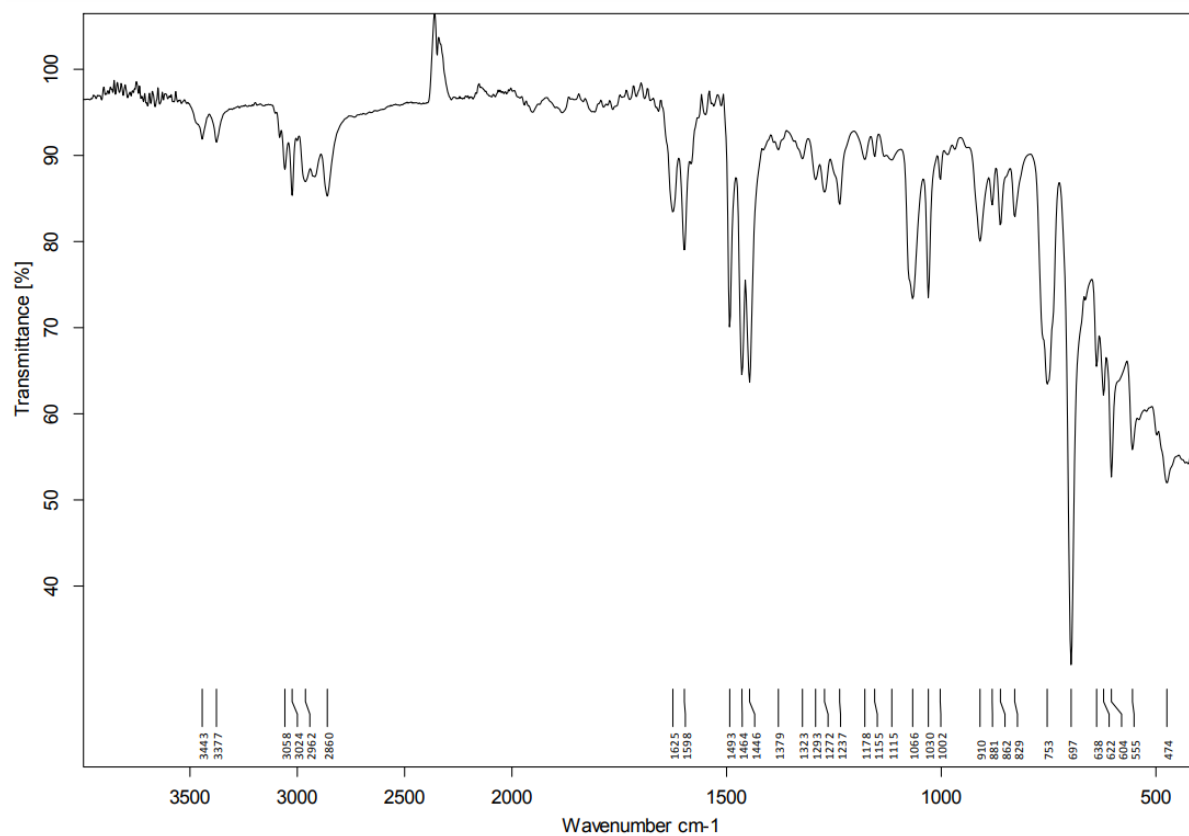

Figure S 22: IR spectrum of  $[(\text{thf})_2\text{Mg}\{\text{NH}-2,6-(\text{Ph}_2\text{CH})-4\text{-Me-C}_6\text{H}_2\}(\text{}^n\text{Bu}/\text{}^s\text{Bu})]$  **2b<sub>Bu</sub>**.

## 1.6 $[(\text{thf})_2\text{Mg}\{\text{NH}-2,6-(\text{Ph}_2\text{CH})-4-\text{Me}-\text{C}_6\text{H}_2\}(\text{Ph})]$ **2b<sub>Ph</sub>**

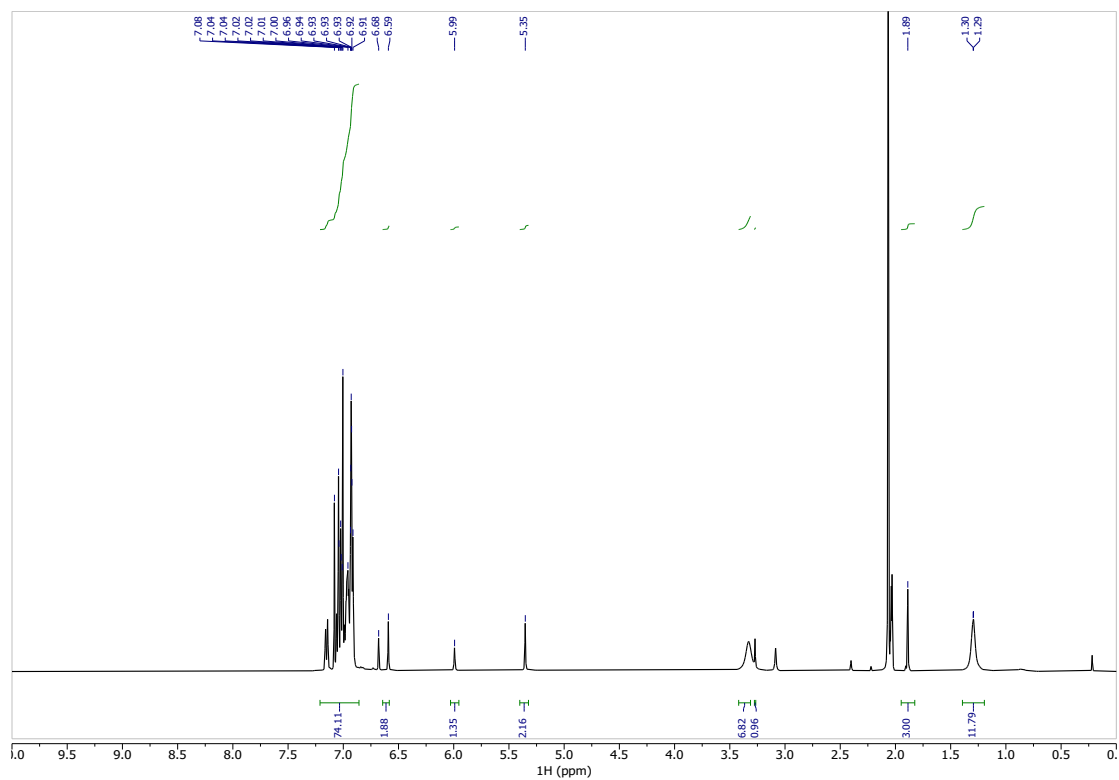

Figure S 23:  $^1\text{H}$ -NMR-Spectrum (400 MHz,  $[\text{D}_8]\text{Tol}$ , 297 K) of  $[(\text{thf})_2\text{Mg}\{\text{NH}-2,6-(\text{Ph}_2\text{CH})-4-\text{Me}-\text{C}_6\text{H}_2\}(\text{Ph})]$  **2b<sub>Ph</sub>**.

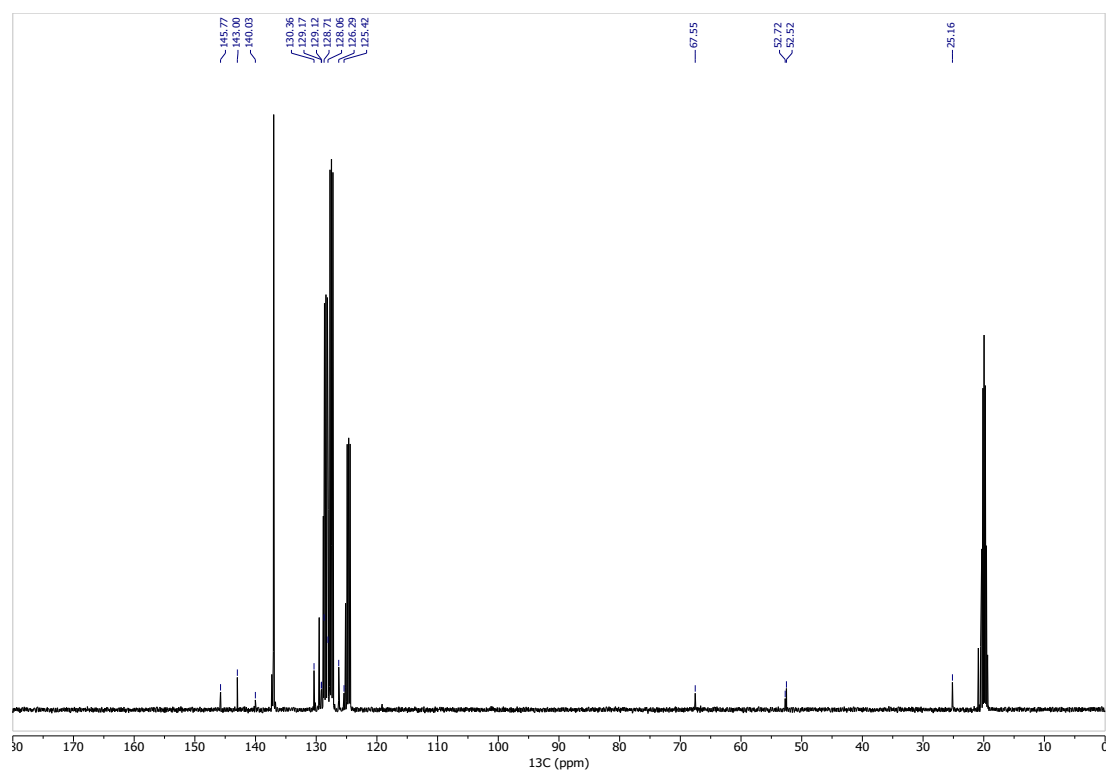

Figure S 24:  $^{13}\text{C}\{^1\text{H}\}$ -NMR-Spectrum (101 MHz,  $[\text{D}_8]\text{Tol}$ , 297 K) of  $[(\text{thf})_2\text{Mg}\{\text{NH}-2,6-(\text{Ph}_2\text{CH})-4-\text{Me}-\text{C}_6\text{H}_2\}(\text{Ph})]$  **2b<sub>Ph</sub>**.

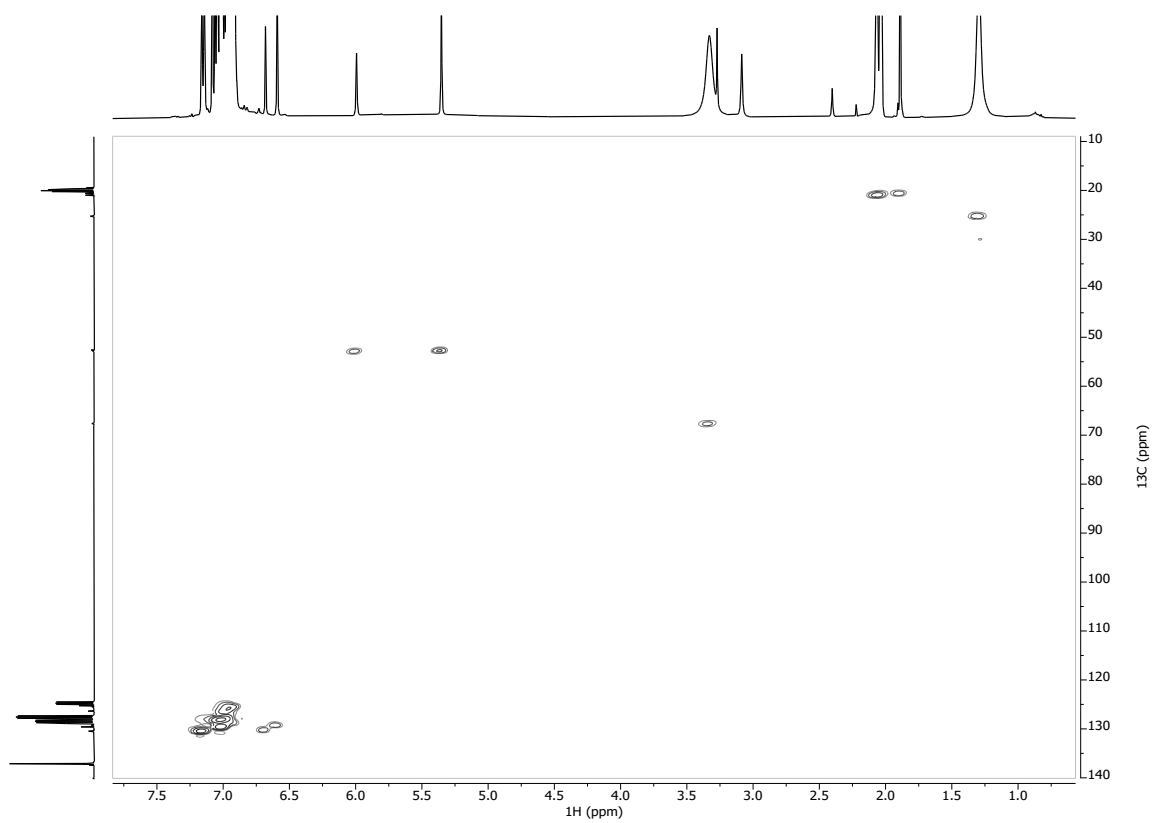

Figure S 25: HSQC-NMR-Spectrum (400 MHz,  $[D_8]Tol$ , 297 K) of  $[(thf)_2Mg \{NH-2,6-(Ph_2CH)-4-Me-C_6H_2\}(Ph)]$  **2b<sub>Ph</sub>**.



## 1.7 $[(\text{thf})_2\text{Mg}\{\text{NH}-2,6-(\text{Ph}_2\text{CH})-4-\text{Me}-\text{C}_6\text{H}_2\}_2]$ **2b**

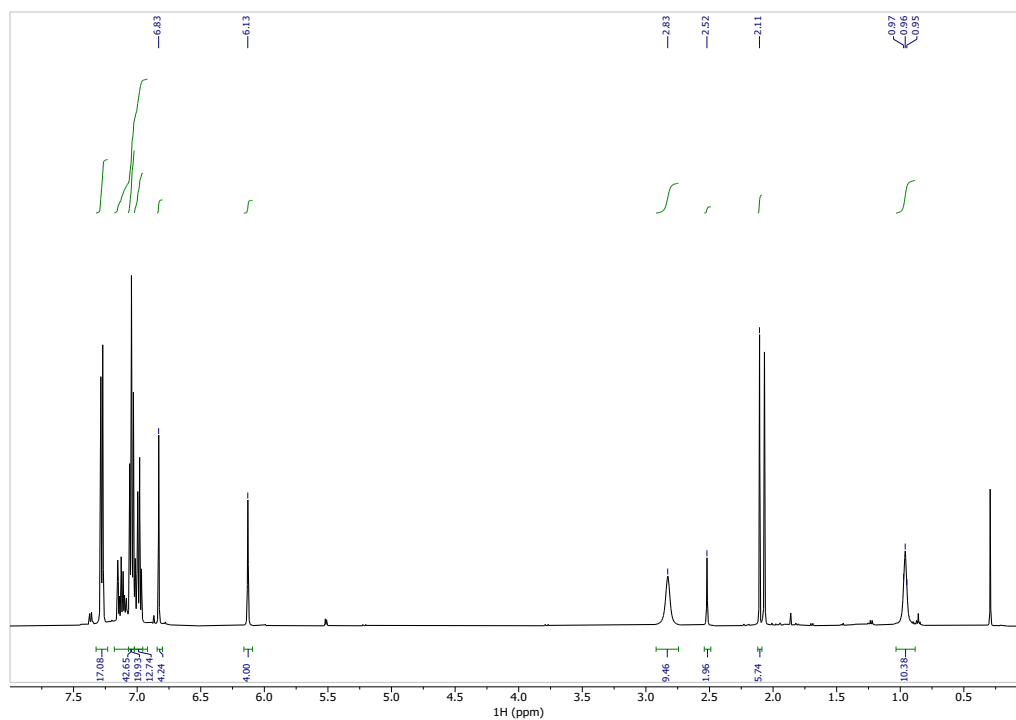

Figure S 26:  $^1\text{H}$ -NMR-Spectrum (400 MHz,  $\text{C}_6\text{D}_6$ , 297 K) of  $[(\text{thf})_2\text{Mg}\{\text{NH}-2,6-(\text{Ph}_2\text{CH})-4-\text{Me}-\text{C}_6\text{H}_2\}_2]$  **2b**. The sample contains substoichiometric amounts of toluene.

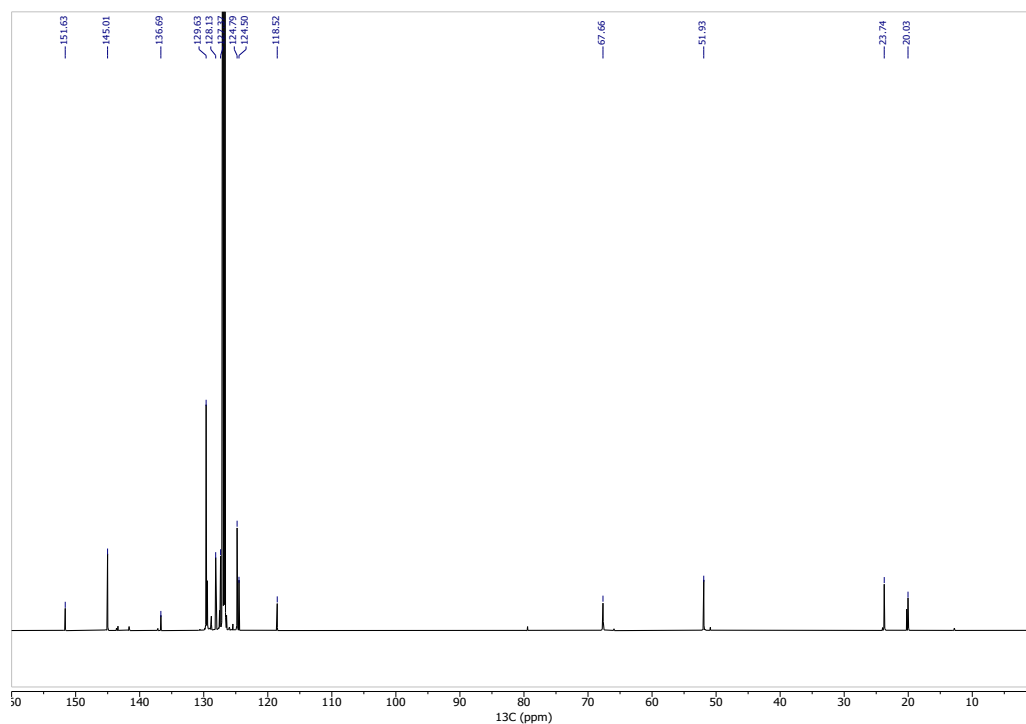

Figure S 27:  $^{13}\text{C}\{^1\text{H}\}$ -NMR-Spectrum (101 MHz,  $\text{C}_6\text{D}_6$ , 297 K) of  $[(\text{thf})_2\text{Mg}\{\text{NH}-2,6-(\text{Ph}_2\text{CH})-4-\text{Me}-\text{C}_6\text{H}_2\}_2]$  **2b**. The sample contains substoichiometric amounts of toluene.

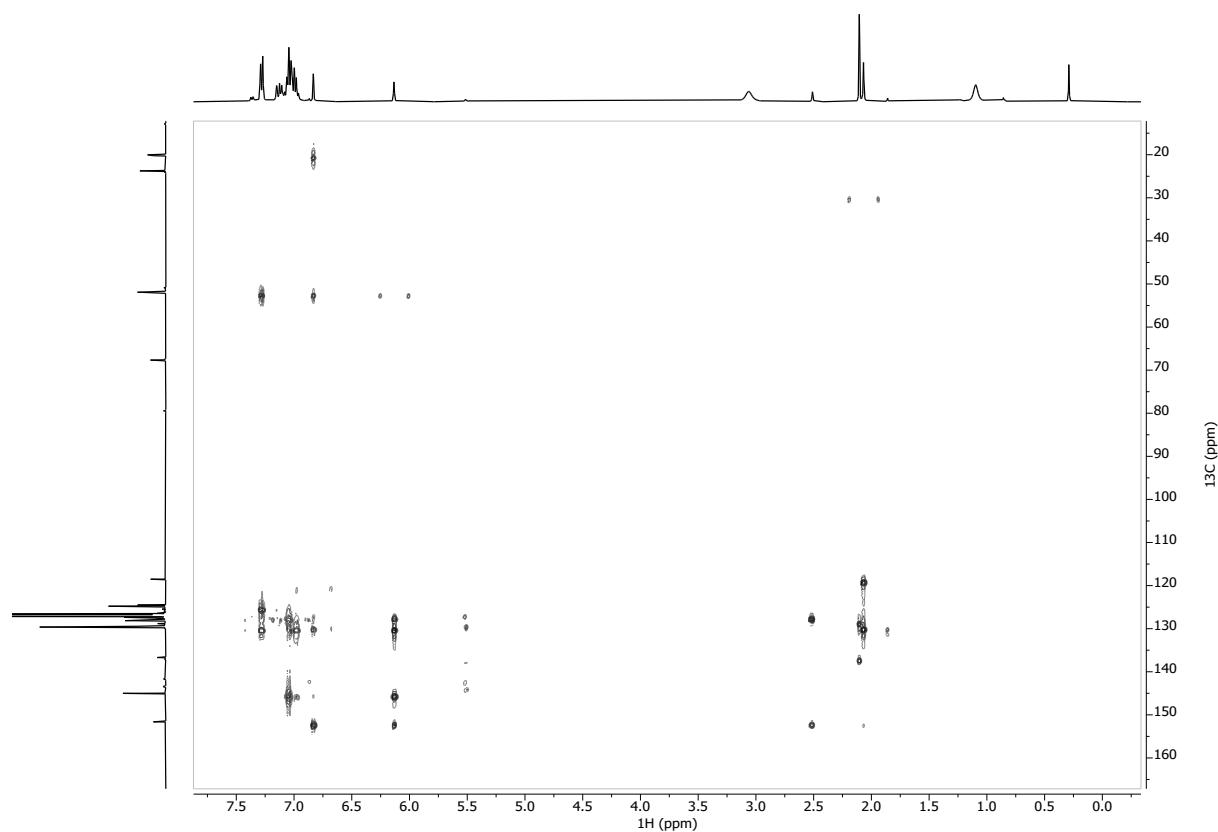

Figure S 28: HMBC-NMR-Spectrum (400 MHz,  $C_6D_6$ , 297 K) of  $[(thf)_2Mg \{NH-2,6-(Ph_2CH)-4-Me-C_6H_2\}_2]$  **2b**. The sample contains substoichiometric amounts of toluene.

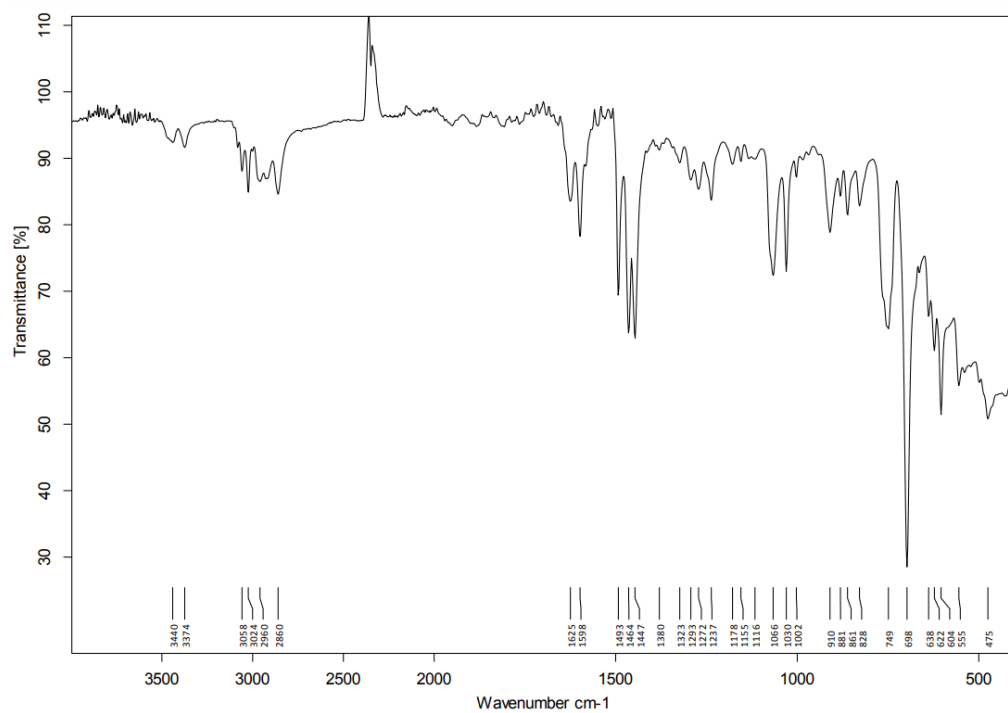

Figure S 29: IR spectrum of  $[(thf)_2Mg \{NH-2,6-(Ph_2CH)-4-Me-C_6H_2\}_2]$  **2b**.

## 1.8 [(thf)<sub>2</sub>Ca{NH-2,6-(Ph<sub>2</sub>CH)-4-Me-C<sub>6</sub>H<sub>2</sub>}<sub>2</sub>] **2c**

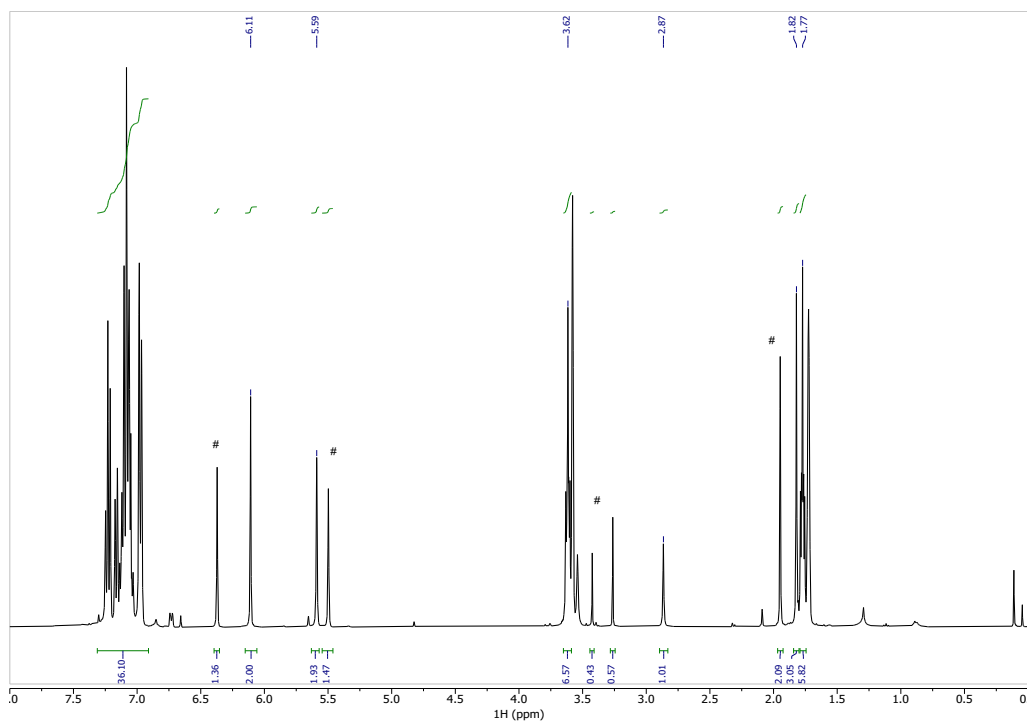

Figure S 30: <sup>1</sup>H-NMR-Spectrum (400 MHz, [D<sub>8</sub>]THF, 297 K) of [(thf)<sub>2</sub>Ca{NH-2,6-(Ph<sub>2</sub>CH)-4-Me-C<sub>6</sub>H<sub>2</sub>}<sub>2</sub>] **2c**. The sample contains protonated aniline (#).

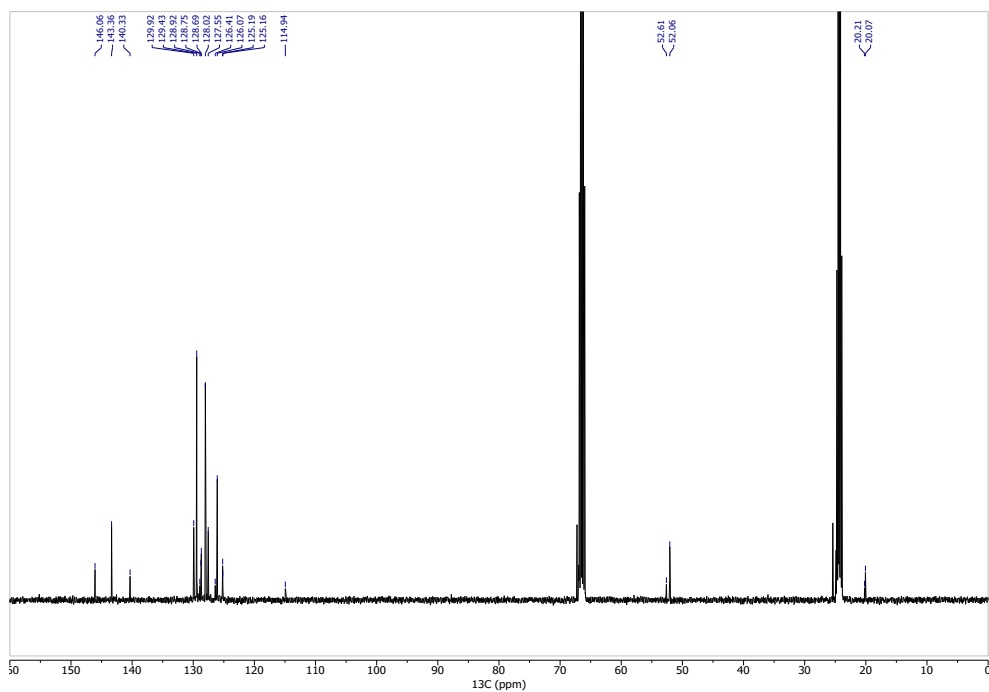

Figure S 31: <sup>13</sup>C{<sup>1</sup>H}-NMR-Spectrum (101 MHz, [D<sub>8</sub>]THF, 297 K) of [(thf)<sub>2</sub>Ca{NH-2,6-(Ph<sub>2</sub>CH)-4-Me-C<sub>6</sub>H<sub>2</sub>}<sub>2</sub>] **2c**. The sample contains protonated aniline (#).

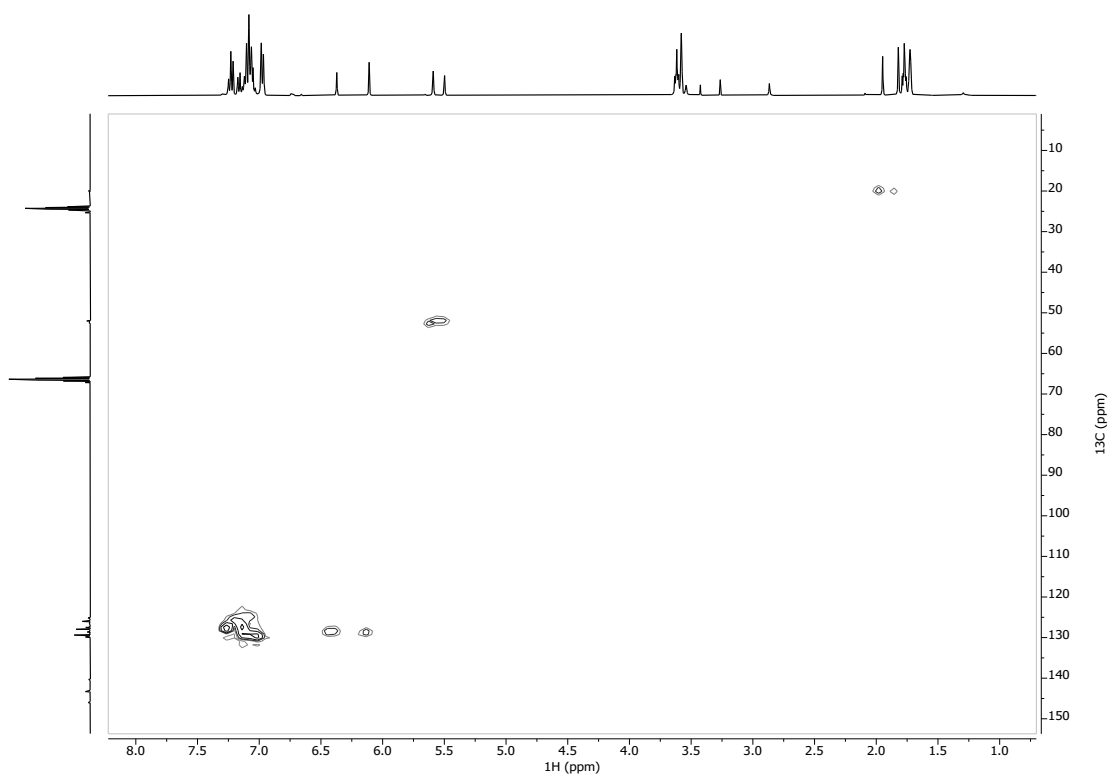

Figure S 32: HSQC-NMR-Spectrum (400 MHz,  $[D_8]THF$ , 297 K) of  $[(thf)_2Ca\{NH-2,6-(Ph_2CH)-4-Me-C_6H_2\}_2]$  **2c**. The sample contains protonated aniline (#).

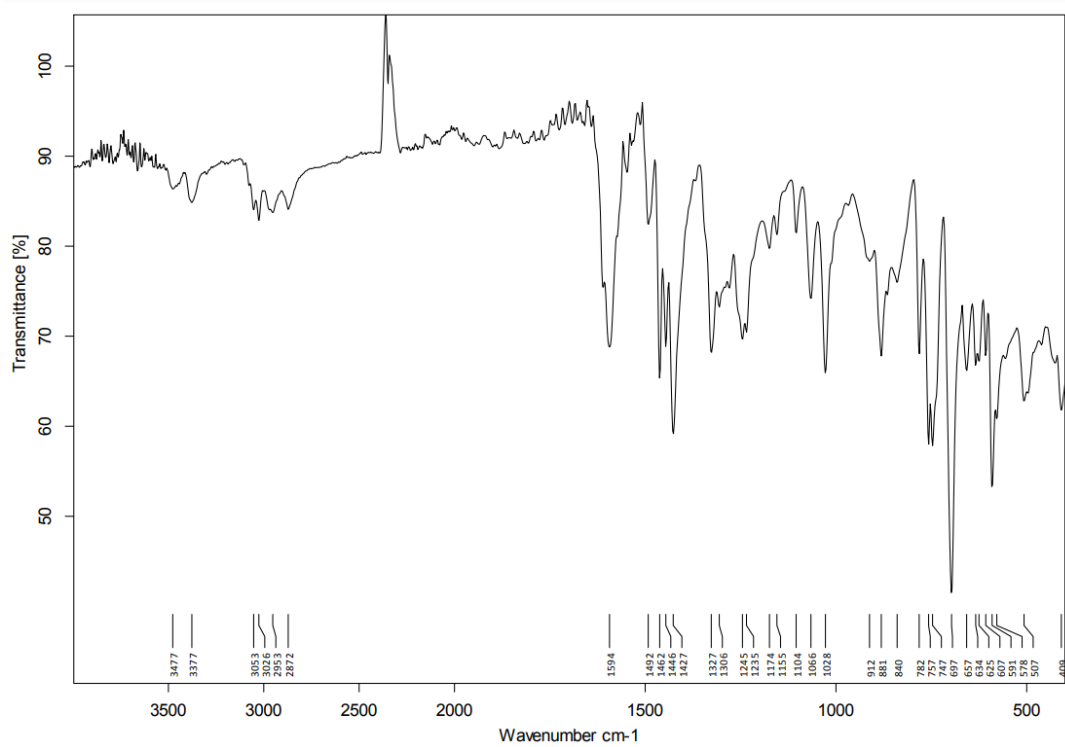

Figure S 33: IR spectrum (ATR) of  $[(thf)_2Ca\{NH-2,6-(Ph_2CH)-4-Me-C_6H_2\}_2]$  **2c**.

## 1.9 [(thf)<sub>2</sub>Sr{NH-2-(Ph<sub>2</sub>C)-6-(Ph<sub>2</sub>CH)-4-Me-C<sub>6</sub>H<sub>2</sub>}]<sub>2</sub> **2d'**

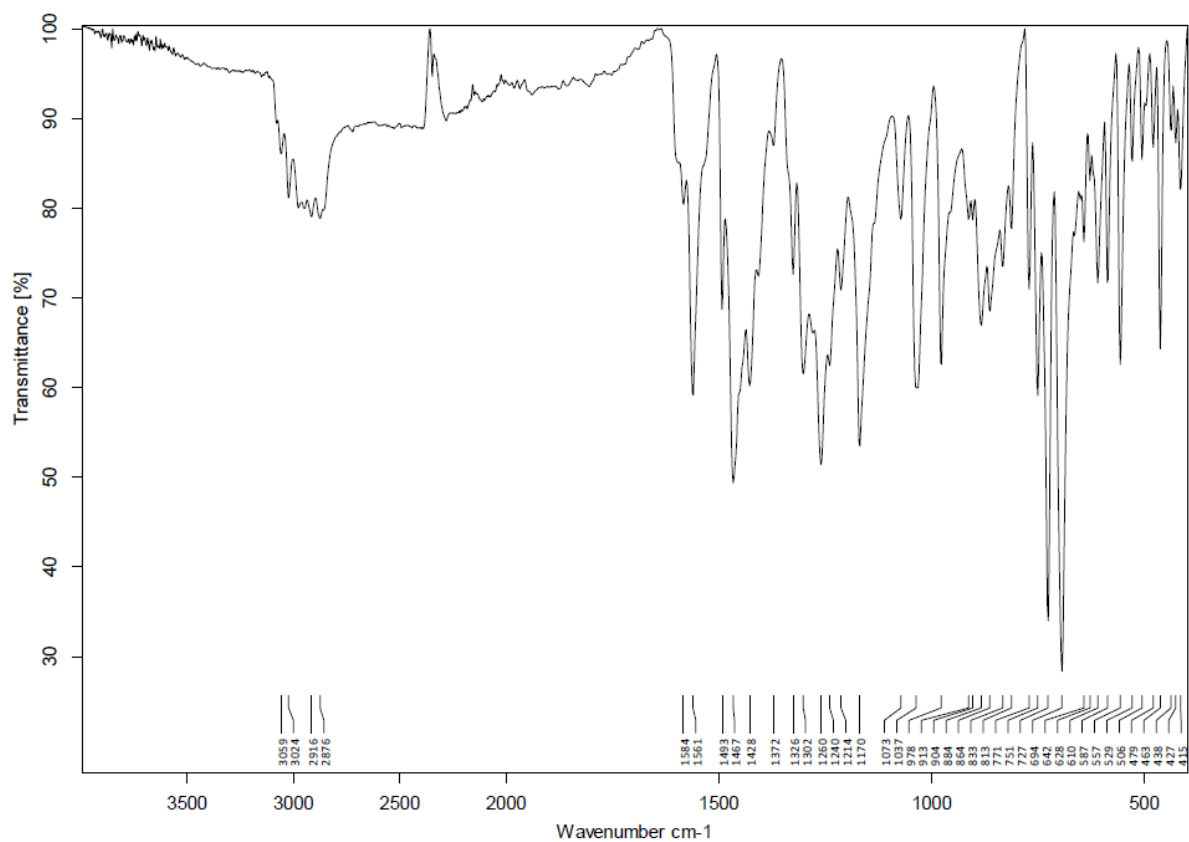

Figure S 34: IR spectrum (ATR) of [(thf)<sub>2</sub>Sr {NH-2-(Ph<sub>2</sub>C)-6-(Ph<sub>2</sub>CH)-4-Me-C<sub>6</sub>H<sub>2</sub>}]<sub>2</sub> **2d'**.

## 1.10 $[(\text{thf})_2\text{Sr}\{\text{NH}-2,6-(\text{Ph}_2\text{CH})_2-4-\text{Me}-\text{C}_6\text{H}_2\}_2]$ **2d**

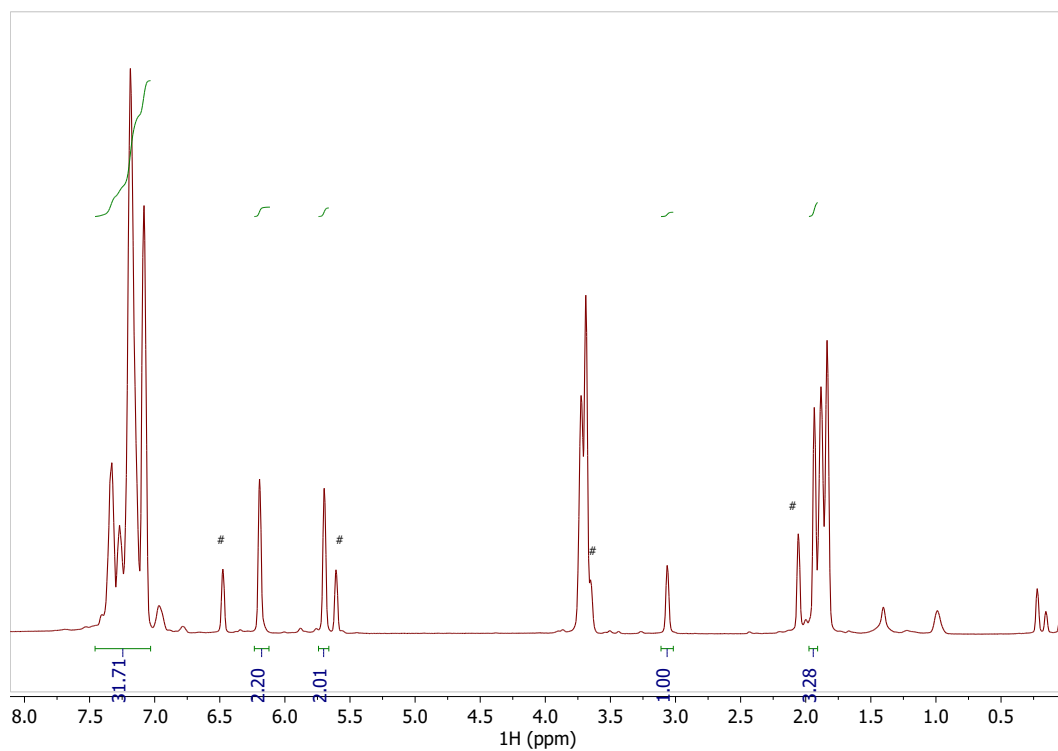

Figure S 35:  $^1\text{H}$ -NMR spectrum ( $[\text{D}_8]\text{THF}$ , 297K, 400 MHz) of  $[(\text{thf})_2\text{Sr}\{\text{NH}-2,6-(\text{Ph}_2\text{CH})_2-4-\text{Me}-\text{C}_6\text{H}_2\}_2]$  **2d**.

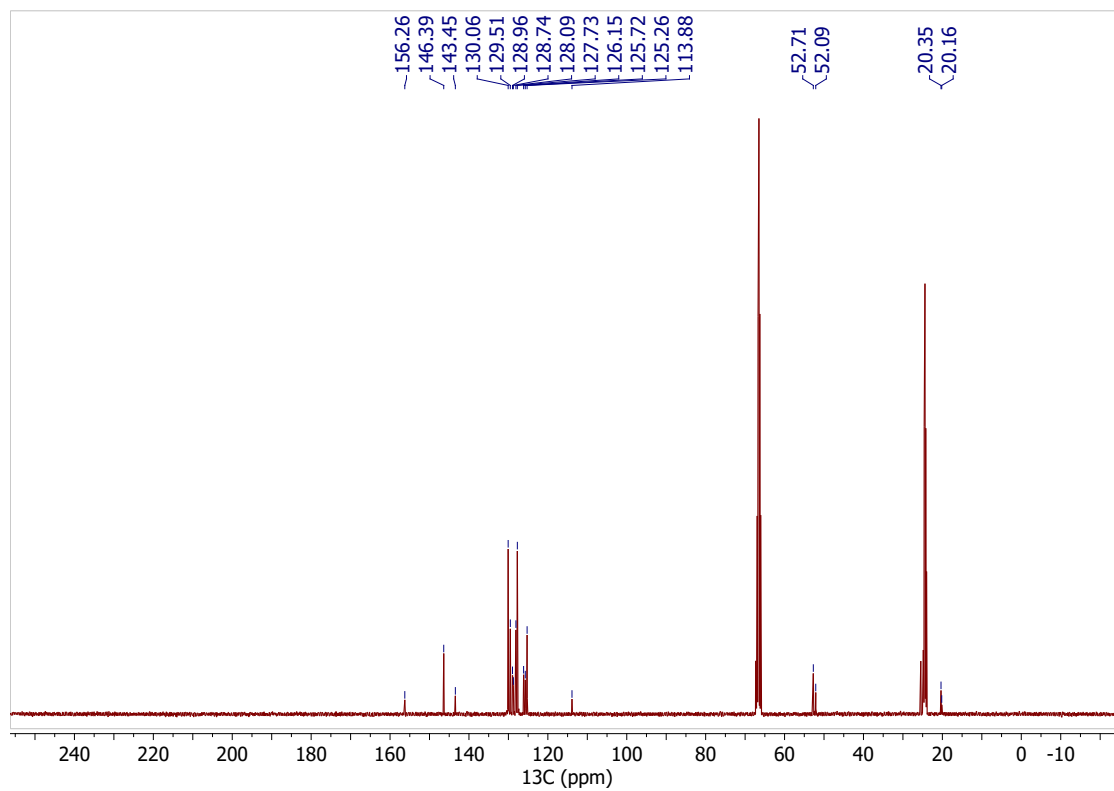

Figure S 36:  $^{13}\text{C}\{^1\text{H}\}$ -NMR spectrum ( $[\text{D}_8]\text{THF}$ , 297K, 101 MHz) of  $[(\text{thf})_2\text{Sr}\{\text{NH}-2,6-(\text{Ph}_2\text{CH})_2-4-\text{Me}-\text{C}_6\text{H}_2\}_2]$  **2d**.

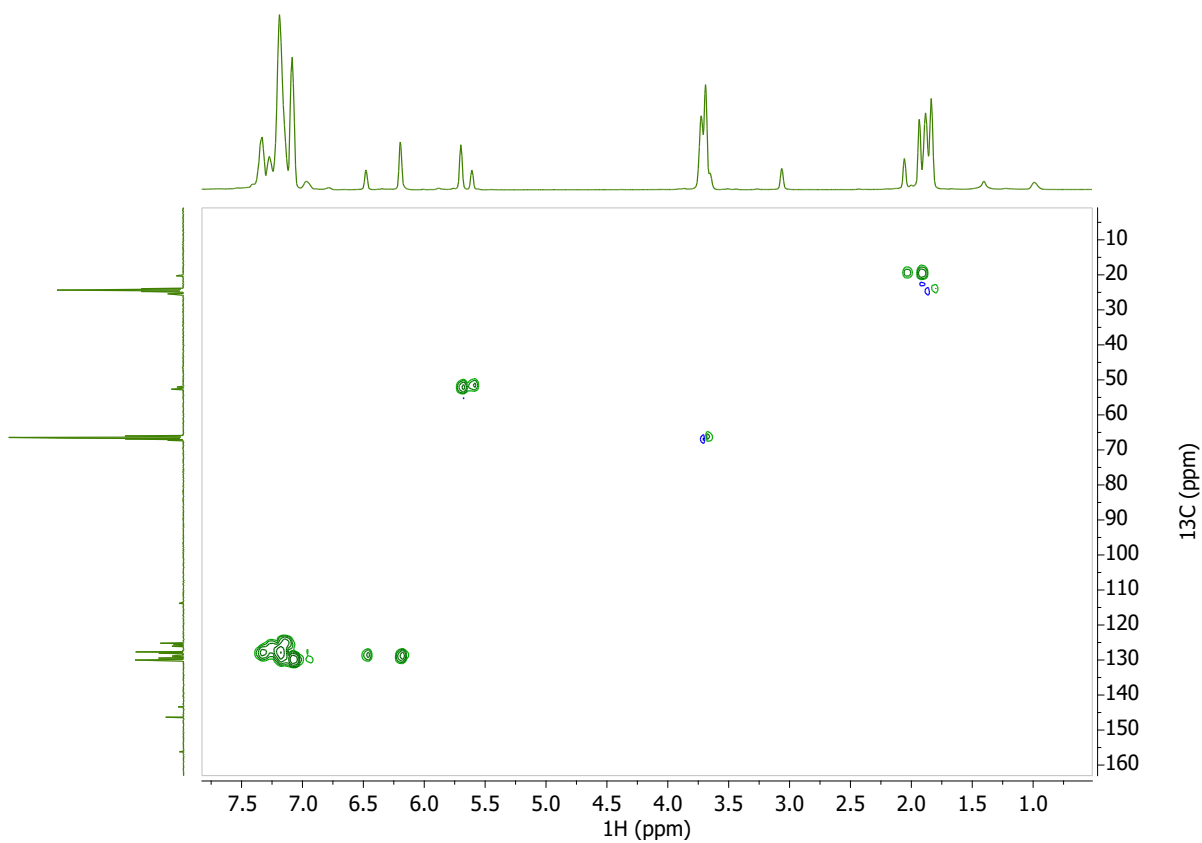

Figure S 37: HSQC-DEPT-NMR spectrum ( $[\text{D}_8]$ THF, 297K, 400 MHz) of  $[(\text{thf})_2\text{Sr}\{\text{NH}-2,6-(\text{Ph}_2\text{CH})_2-4-\text{Me}-\text{C}_6\text{H}_2\}_2]$  **2d**.

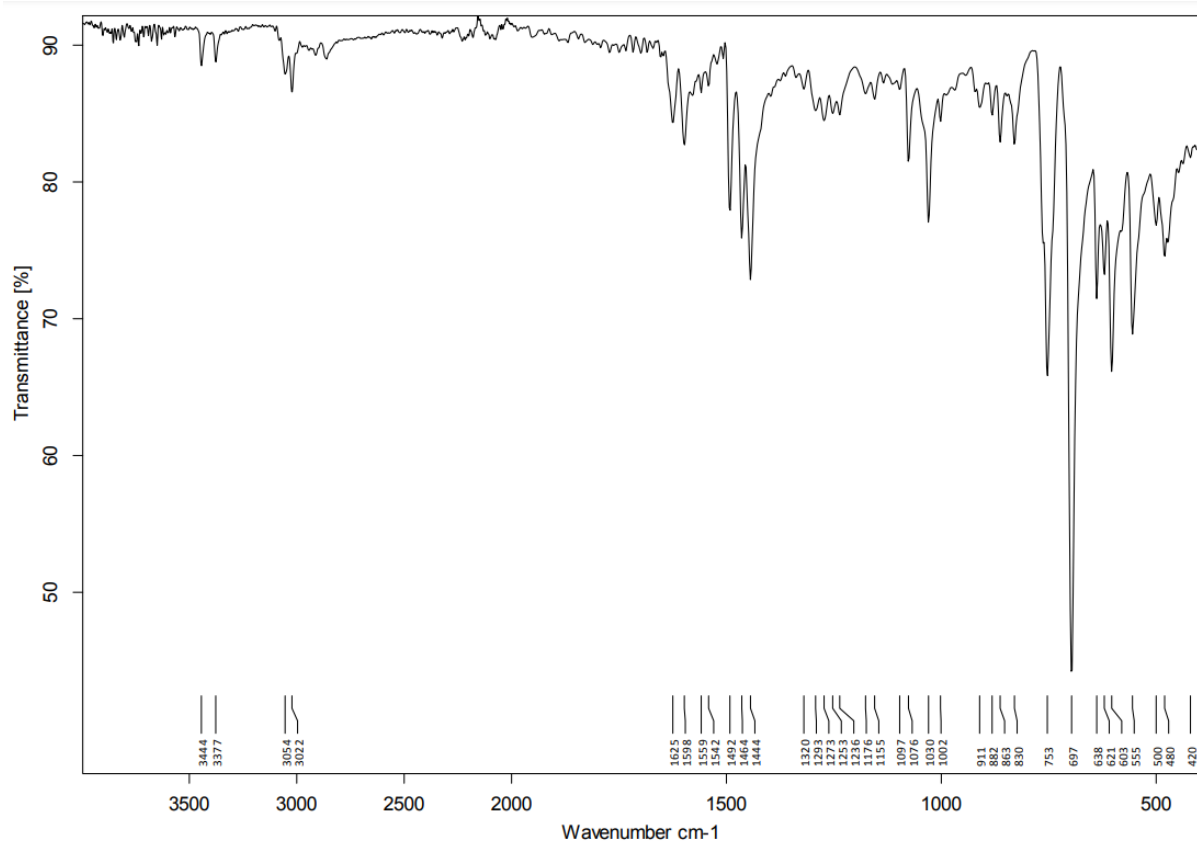

Figure S 38: IR spectrum (ATR) of  $[(\text{thf})_2\text{Sr}\{\text{NH}-2,6-(\text{Ph}_2\text{CH})-4\text{-Me-C}_6\text{H}_2\}_2]$  **2d**.



### 1.11 [(thf)<sub>2</sub>Ba{NH-2-(Ph<sub>2</sub>C)-6-(Ph<sub>2</sub>CH)-4-Me-C<sub>6</sub>H<sub>2</sub>}]<sub>2</sub> **2e'**

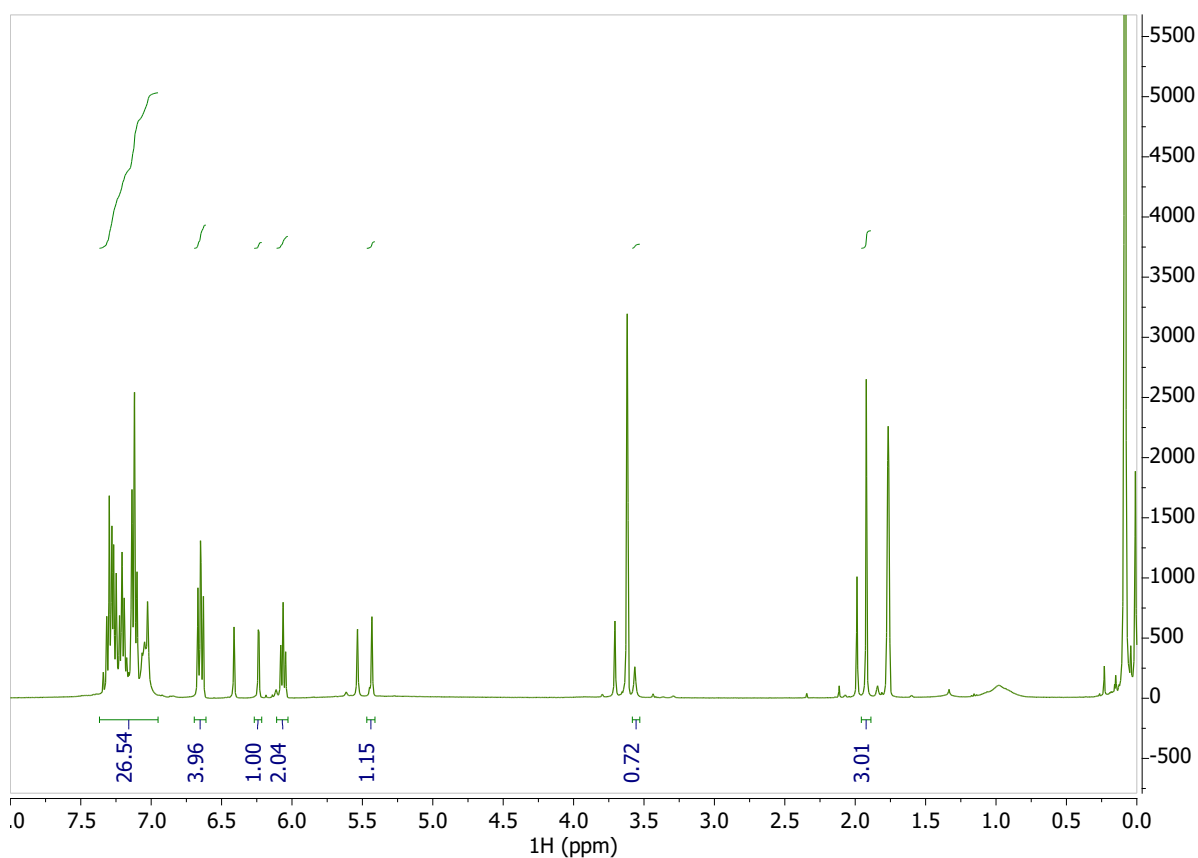

Figure S 39: <sup>1</sup>H-NMR-Spectrum (400 MHz, [D<sub>8</sub>]THF, 297 K) of [(thf)<sub>2</sub>Ba{NH-2-(Ph<sub>2</sub>C)-6-(Ph<sub>2</sub>CH)-4-Me-C<sub>6</sub>H<sub>2</sub>}]<sub>2</sub> **2e'**.

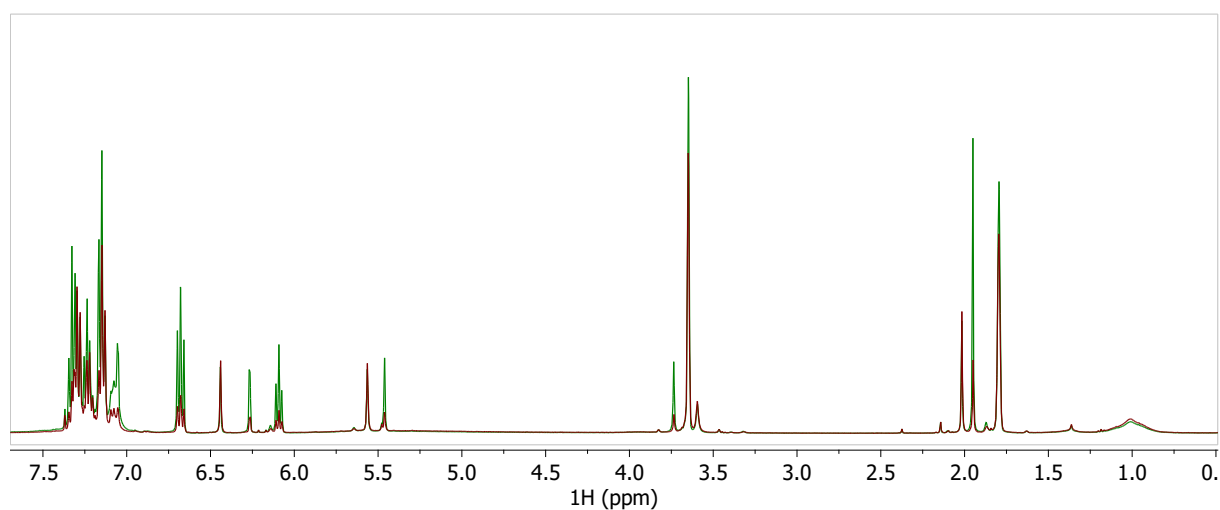

Figure S 40: Overlay of <sup>1</sup>H-NMR-Spectra (400 MHz, [D<sub>8</sub>]THF, 297 K) *in situ* generated [(thf)<sub>2</sub>Ba{NH-2-(Ph<sub>2</sub>C)-6-(Ph<sub>2</sub>CH)-4-Me-C<sub>6</sub>H<sub>2</sub>}]<sub>2</sub> **2e'** directly prepared (green) and after one hour (red). The compound **2e'** precipitated during this period in red crystals, yielding a intensity loss in <sup>1</sup>H-NMR spectrum.

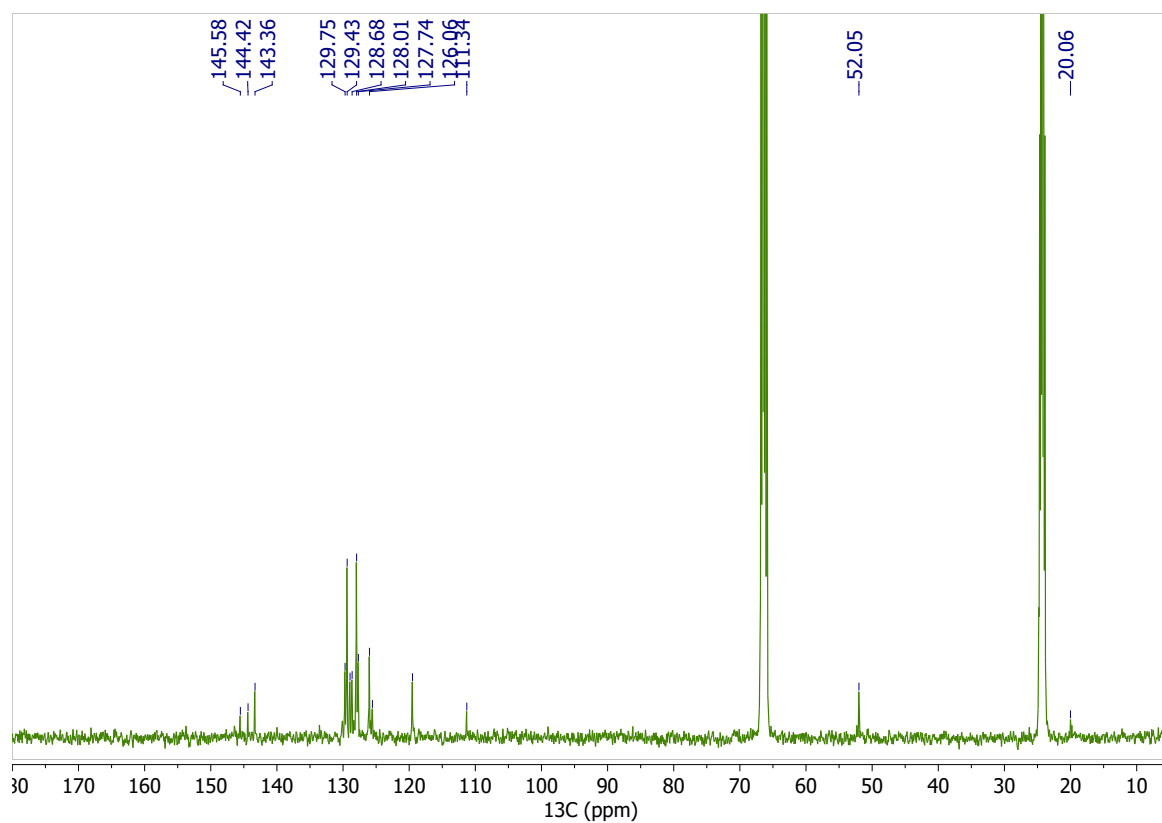

Figure S 41:  $^{13}\text{C}\{^1\text{H}\}$ -NMR-Spectrum (101 MHz,  $[\text{D}_8]\text{THF}$ , 297 K) of  $[(\text{thf})_2\text{Ba}\{\text{NH}-2-(\text{Ph}_2\text{C})-6-(\text{Ph}_2\text{CH})-4-\text{Me}-\text{C}_6\text{H}_2\}]$  **2e'**.

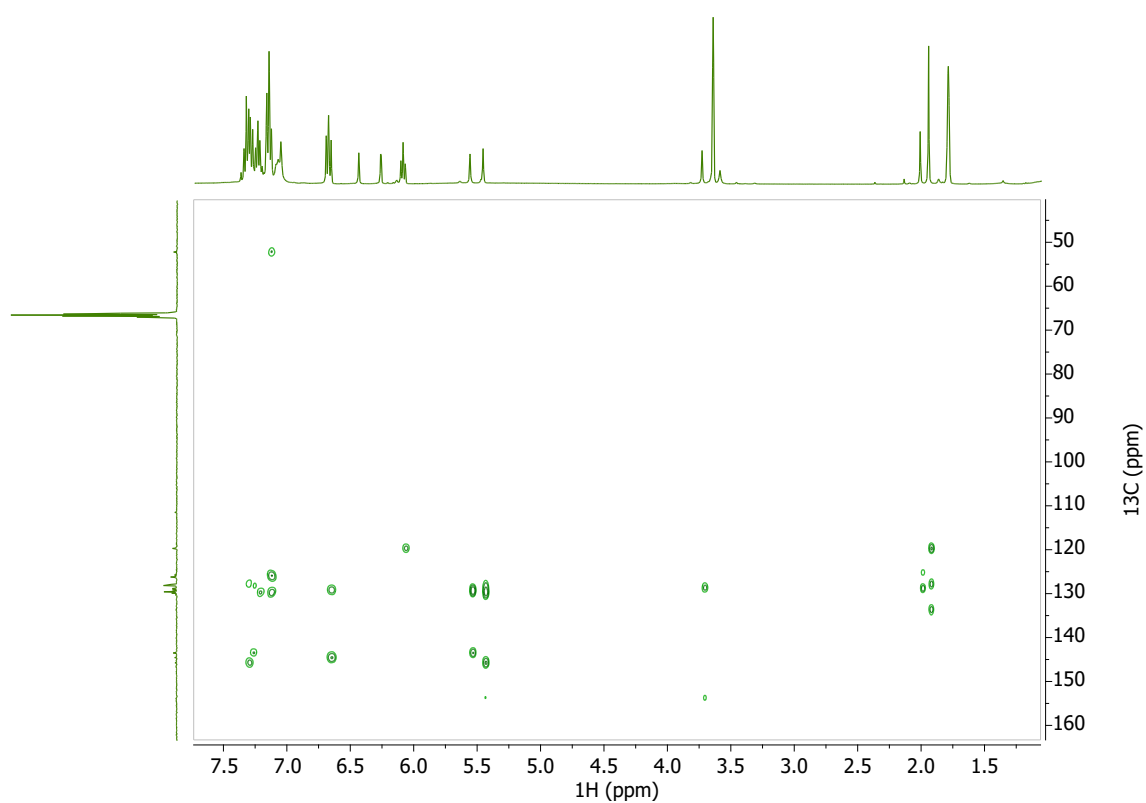

Figure S 42:  $^1\text{H}$ -HMBC-NMR-Spectrum (400 MHz,  $[\text{D}_8]\text{THF}$ , 297 K) of  $[(\text{thf})_2\text{Ba}\{\text{NH}-2-(\text{Ph}_2\text{C})-6-(\text{Ph}_2\text{CH})-4-\text{Me}-\text{C}_6\text{H}_2\}]$  **2e'**.

## 2 Crystallographic data

Table S 1: Crystal data and refinement details for the X-ray structure determinations.

| Compound                                            | <b>1b</b>                                                       | <b>1c</b>                                                       | <b>1d</b>                                                           | <b>2b<sub>Bu</sub></b>                            | <b>2b<sub>Ph</sub></b>                            |
|-----------------------------------------------------|-----------------------------------------------------------------|-----------------------------------------------------------------|---------------------------------------------------------------------|---------------------------------------------------|---------------------------------------------------|
| formula                                             | C <sub>60</sub> H <sub>60</sub> MgN <sub>2</sub> O <sub>3</sub> | C <sub>56</sub> H <sub>52</sub> CaN <sub>2</sub> O <sub>2</sub> | C <sub>60</sub> H <sub>60</sub> N <sub>2</sub> O <sub>3</sub> Sr[*] | C <sub>45</sub> H <sub>53</sub> MgNO <sub>2</sub> | C <sub>47</sub> H <sub>49</sub> MgNO <sub>2</sub> |
| fw (g·mol <sup>-1</sup> )                           | 881.41                                                          | 825.07                                                          | 944.72[*]                                                           | 664.19                                            | 684.18                                            |
| T/°C                                                | -140(2)                                                         | -140(2)                                                         | -140(2)                                                             | -140(2)                                           | -140(2)                                           |
| crystal system                                      | monoclinic                                                      | triclinic                                                       | Triclinic                                                           | monoclinic                                        | monoclinic                                        |
| space group                                         | P 2 <sub>1</sub> /c                                             | P $\bar{1}$                                                     | P $\bar{1}$                                                         | C 2/c                                             | C 2/c                                             |
| a/ Å                                                | 21.6285(5)                                                      | 9.7673(3)                                                       | 11.8826(2)                                                          | 27.9665(5)                                        | 28.1647(5)                                        |
| b/ Å                                                | 10.8549(2)                                                      | 11.2864(4)                                                      | 20.3808(4)                                                          | 17.3376(4)                                        | 17.8406(4)                                        |
| c/ Å                                                | 21.1559(4)                                                      | 11.3300(3)                                                      | 23.1208(4)                                                          | 18.9540(5)                                        | 18.1355(3)                                        |
| $\alpha$ /°                                         | 90                                                              | 62.604(2)                                                       | 66.247(1)                                                           | 90                                                | 90                                                |
| $\beta$ /°                                          | 103.708(1)                                                      | 82.371(2)                                                       | 78.218(1)                                                           | 124.620(1)                                        | 124.063(1)                                        |
| $\gamma$ /°                                         | 90                                                              | 86.915(1)                                                       | 84.243(1)                                                           | 90                                                | 90                                                |
| V/Å <sup>3</sup>                                    | 4825.40(17)                                                     | 1099.06(6)                                                      | 5016.01(16)                                                         | 7563.0(3)                                         | 7549.1(3)                                         |
| Z                                                   | 4                                                               | 1                                                               | 4                                                                   | 8                                                 | 8                                                 |
| $\rho$ (g·cm <sup>-3</sup> )                        | 1.213                                                           | 1.247                                                           | 1.251[*]                                                            | 1.167                                             | 1.204                                             |
| $\mu$ (cm <sup>-1</sup> )                           | 0.85                                                            | 1.88                                                            | 11.22[*]                                                            | 0.85                                              | 0.87                                              |
| measured data                                       | 28122                                                           | 13616                                                           | 59383                                                               | 40739                                             | 21851                                             |
| data with $I > 2\sigma(I)$                          | 8168                                                            | 3995                                                            | 16074                                                               | 6309                                              | 6510                                              |
| unique data ( $R_{\text{int}}$ )                    | 10982/0.0562                                                    | 4987/0.0448                                                     | 22603/0.0441                                                        | 8671/0.0497                                       | 8616/0.0480                                       |
| wR <sub>2</sub> (all data, on $F^2$ ) <sup>a)</sup> | 0.1505                                                          | 0.1617                                                          | 0.2358                                                              | 0.2154                                            | 0.1400                                            |
| R <sub>1</sub> ( $I > 2\sigma(I)$ ) <sup>a)</sup>   | 0.0667                                                          | 0.0698                                                          | 0.0902                                                              | 0.0884                                            | 0.0651                                            |
| s <sup>b)</sup>                                     | 1.075                                                           | 1.055                                                           | 1.087                                                               | 1.079                                             | 1.089                                             |
| Res. dens./e·Å <sup>-3</sup>                        | 0.366/-0.336                                                    | 0.381/-0.589                                                    | 2.276/-1.086                                                        | 1.362/-0.406                                      | 0.658/-0.333                                      |
| absorpt method                                      | multi-scan                                                      | multi-scan                                                      | multi-scan                                                          | multi-scan                                        | multi-scan                                        |
| absorpt corr T <sub>min</sub> /max                  | 0.6592/0.7456                                                   | 0.6891/0.7456                                                   | 0.6564/0.7456                                                       | 0.6796/0.7456                                     | 0.6895/0.7456                                     |
| CCDC No.                                            | 2152421                                                         | 2152422                                                         | 2152423                                                             | 2152424                                           | 2152425                                           |

Contd. Table S 1: Crystal data and refinement details for the X-ray structure determinations.

| Compound                                                                    | <b>2b</b>                                                       | <b>2c</b>                                                       | <b>2d</b>                                                        | <b>2d'</b>                                                                        | <b>2e'</b>                                                                     |
|-----------------------------------------------------------------------------|-----------------------------------------------------------------|-----------------------------------------------------------------|------------------------------------------------------------------|-----------------------------------------------------------------------------------|--------------------------------------------------------------------------------|
| formula                                                                     | C <sub>78</sub> H <sub>80</sub> MgN <sub>2</sub> O <sub>3</sub> | C <sub>86</sub> H <sub>96</sub> CaN <sub>2</sub> O <sub>5</sub> | C <sub>74</sub> H <sub>72</sub> N <sub>2</sub> O <sub>2</sub> Sr | C <sub>82</sub> H <sub>86</sub> N <sub>2</sub> O <sub>4</sub> Sr <sub>2</sub> [*] | C <sub>96</sub> H <sub>102</sub> Ba <sub>2</sub> N <sub>2</sub> O <sub>4</sub> |
| fw (g·mol <sup>-1</sup> )                                                   | 1117.75                                                         | 1277.72                                                         | 1108.95                                                          | 1338.76[*]                                                                        | 1622.47                                                                        |
| °C                                                                          | -140(2)                                                         | -140(2)                                                         | -153(2)                                                          | -140(2)                                                                           | -140(2)                                                                        |
| crystal system                                                              | triclinic                                                       | orthorhombic                                                    | triclinic                                                        | triclinic                                                                         | triclinic                                                                      |
| space group                                                                 | P $\bar{1}$                                                     | F d d 2                                                         | P $\bar{1}$                                                      | P $\bar{1}$                                                                       | P $\bar{1}$                                                                    |
| <i>a</i> / Å                                                                | 11.6149(2)                                                      | 30.1857(5)                                                      | 9.7312(13)                                                       | 11.4529(4)                                                                        | 11.4133(3)                                                                     |
| <i>b</i> / Å                                                                | 11.8127(3)                                                      | 34.5680(5)                                                      | 12.4502(15)                                                      | 12.3964(3)                                                                        | 12.6652(3)                                                                     |
| <i>c</i> / Å                                                                | 23.2496(5)                                                      | 13.7013(2)                                                      | 13.6436(17)                                                      | 14.2573(4)                                                                        | 14.4790(3)                                                                     |
| <i>α</i> /°                                                                 | 103.213(1)                                                      | 90                                                              | 99.627(5)                                                        | 76.074(2)                                                                         | 73.278(1)                                                                      |
| <i>β</i> /°                                                                 | 95.942(1)                                                       | 90                                                              | 108.743(6)                                                       | 83.267(1)                                                                         | 82.423(1)                                                                      |
| <i>γ</i> /°                                                                 | 93.433(1)                                                       | 90                                                              | 104.168(6)                                                       | 82.325(2)                                                                         | 81.815(1)                                                                      |
| <i>V</i> /Å <sup>3</sup>                                                    | 3077.27(12)                                                     | 14296.7(4)                                                      | 1462.3(3)                                                        | 1939.45(10)                                                                       | 1974.90(8)                                                                     |
| <i>Z</i>                                                                    | 2                                                               | 8                                                               | 1                                                                | 1                                                                                 | 1                                                                              |
| <i>ρ</i> (g·cm <sup>-3</sup> )                                              | 1.206                                                           | 1.187                                                           | 1.259                                                            | 1.146[*]                                                                          | 1.364                                                                          |
| <i>μ</i> (cm <sup>-1</sup> )                                                | .81                                                             | 1.42                                                            | 9.71                                                             | 14.21[*]                                                                          | 10.45                                                                          |
| measured data                                                               | 33576                                                           | 45739                                                           | 18360                                                            | 23046                                                                             | 10609                                                                          |
| data with <i>I</i> > 2σ( <i>I</i> )                                         | 9907                                                            | 7433                                                            | 5799                                                             | 6848                                                                              | 7893                                                                           |
| unique data ( <i>R</i> <sub>int</sub> )                                     | 12477/0.0484                                                    | 8180/0.0473                                                     | 7228/0.0437                                                      | 8773/0.0492                                                                       | 8414/0.0252                                                                    |
| w <i>R</i> <sub>2</sub> (all data, on <i>F</i> <sup>2</sup> ) <sup>a)</sup> | 0.2582                                                          | 0.0897                                                          | 0.1003                                                           | 0.1410                                                                            | 0.1005                                                                         |
| <i>R</i> <sub>1</sub> ( <i>I</i> > 2σ( <i>I</i> )) <sup>a)</sup>            | 0.0956                                                          | 0.0454                                                          | 0.0454                                                           | 0.0696                                                                            | 0.0454                                                                         |
| <i>s</i> <sup>b)</sup>                                                      | 1.087                                                           | 1.078                                                           | 1.029                                                            | 1.033                                                                             | 1.083                                                                          |
| Res. dens./e·Å <sup>-3</sup>                                                | 0.703/-0.432                                                    | 0.223/-0.218                                                    | 0.432/-0.463                                                     | 1.770/-0.447                                                                      | 1.208/-0.674                                                                   |
| Flack-parameter                                                             | -                                                               | 0.17(4)                                                         | -                                                                | -                                                                                 | -                                                                              |
| absorpt method                                                              | multi-scan                                                      | multi-scan                                                      | multi-scan                                                       | multi-scan                                                                        | multi-scan                                                                     |
| absorpt corr T <sub>min</sub> /max                                          | 0.6305/0.7456                                                   | 0.6954/0.7391                                                   | 0.6193/0.7456                                                    | 0.6625/0.7456                                                                     | 0.6719/0.7456                                                                  |
| CCDC No.                                                                    | 2152426                                                         | 2152427                                                         | 2161838                                                          | 2152428                                                                           | 2152429                                                                        |

[\*] derived parameters do not contain the contribution of the disordered solvent.

<sup>a)</sup> Definition of the *R* indices:  $R_1 = (\sum ||F_o| - |F_c||) / \sum |F_o|$ ;

$wR_2 = \{\sum [w(F_o^2 - F_c^2)^2] / \sum [w(F_o^2)^2]\}^{1/2}$  with  $w^{-1} = \sigma^2(F_o^2) + (aP)^2 + bP$ ;  $P = [2F_c^2 + \text{Max}(F_o^2)]/3$ ; <sup>b)</sup>  $s = \{\sum [w(F_o^2 - F_c^2)^2] / (N_o - N_p)\}^{1/2}$ .
